# Supplementary material for: Transcriptome sequencing uncovers a three–long noncoding RNA signature in predicting breast cancer survival
Source: PubMed Central journal article supplement (PMC4919625; doi:10.1038/srep27931), 2016-06-24
Supplement: srep27931-s1.pdf [file srep27931-s1.pdf]

## Transcriptome sequencing uncovers a three-long noncoding RNA signature in predicting breast cancer survival

Wenna Guo<sup>1, #</sup>, Qiang Wang<sup>2, #</sup>, Yueping Zhan<sup>1</sup>, Xijia Chen<sup>1</sup>, Qi Yu<sup>3</sup>, Jiawei Zhang<sup>4</sup>, Yi Wang<sup>1</sup>, Xin-jian Xu<sup>5</sup>, and Liucun Zhu<sup>1, \*</sup>

### Supplementary Figure and Table

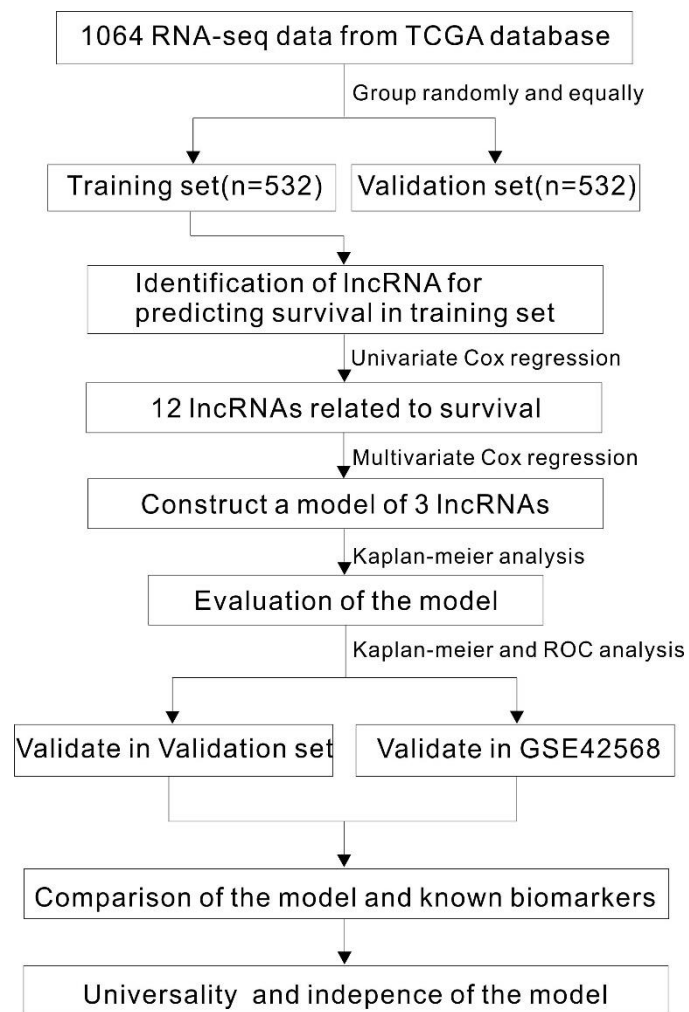

**Supplementary Fig S1. Diagram of the study.** The process to develop the risk score model and validate the efficiency of the gene signature to predict prognostic outcomes.

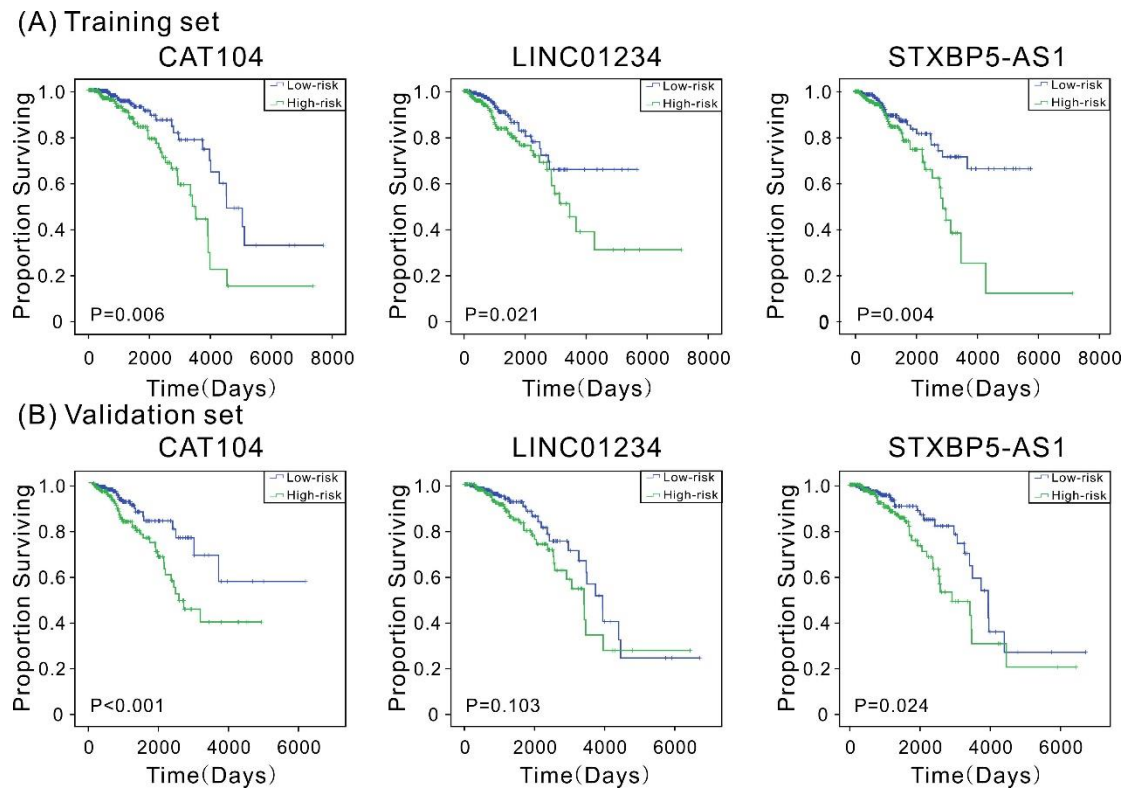

**Supplementary Fig S2. Survival information of individual lncRNA in the Training and Validation sets.** (A) *CAT104*, *LINC01234*, and *STXBP5-AS1* in the training set. (B) *CAT104*, *LINC01234*, and *STXBP5-AS1* in the Validation set. The survival differences between the two curves were determined by the two-sided log-rank test.

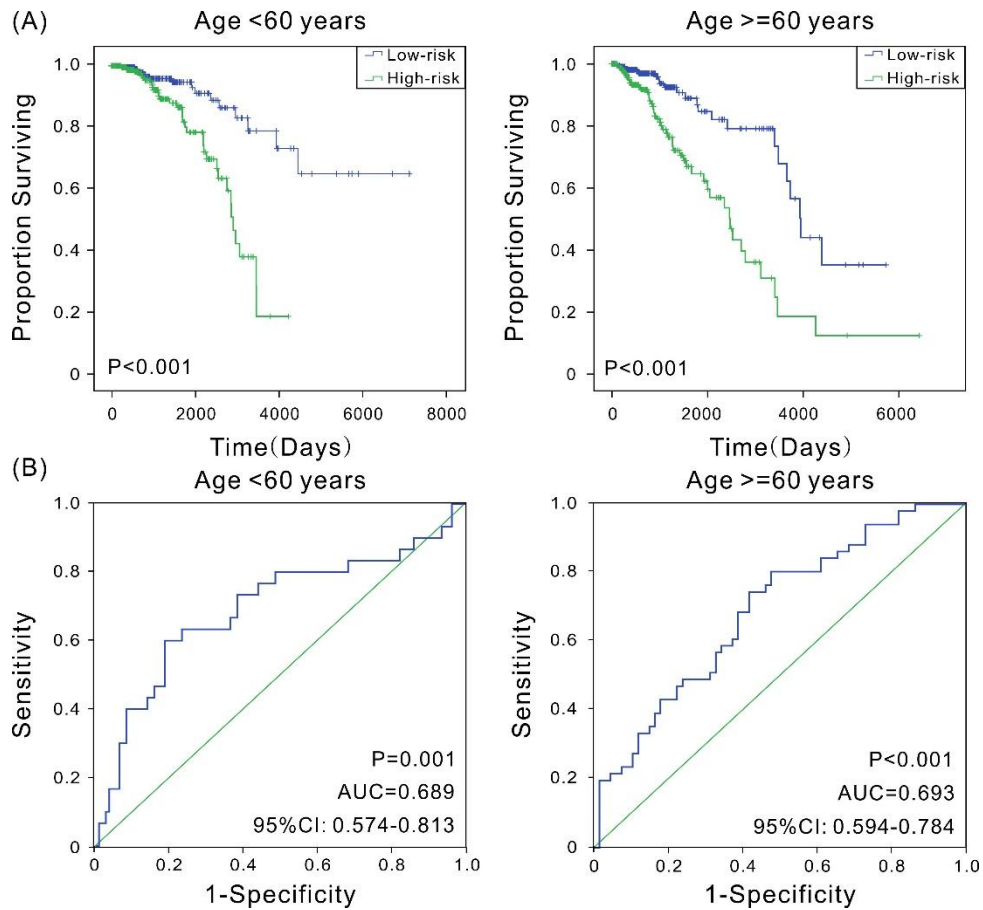

**Supplementary Fig S3. Kaplan–Meier and ROC analysis for overall survival of patients in different age groups.** (A) Kaplan–Meier survival curves show correlation between expression of three-lncRNA signature and overall survival of patients; (B) ROC curves show the sensitivity and specificity of the three-lncRNA signature in predicting the patient overall survival.

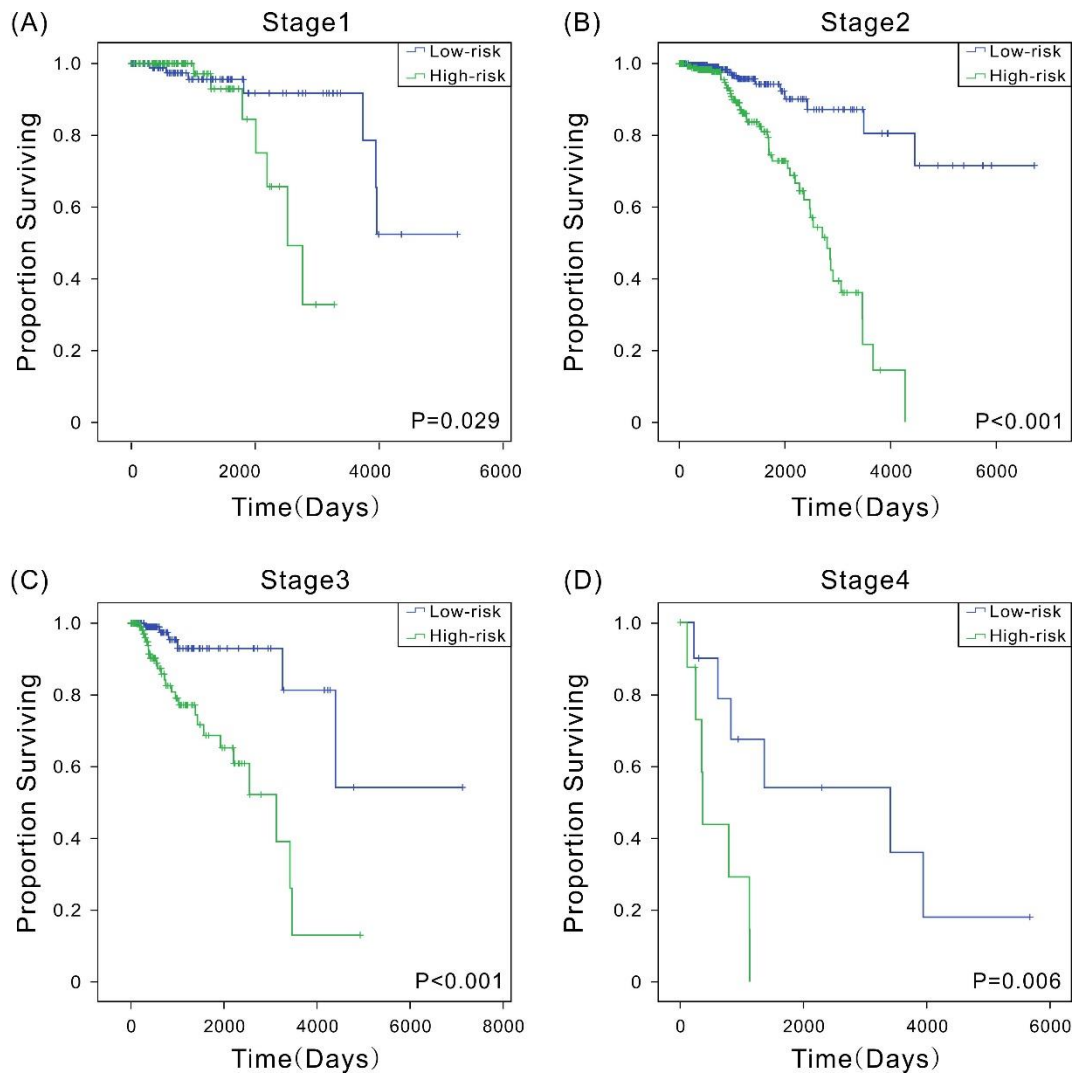

**Supplementary Fig S4. Kaplan–Meier estimates of the overall survival of patients with different breast cancer stages.** The survival differences between the two curves were determined by the two-sided log-rank test.

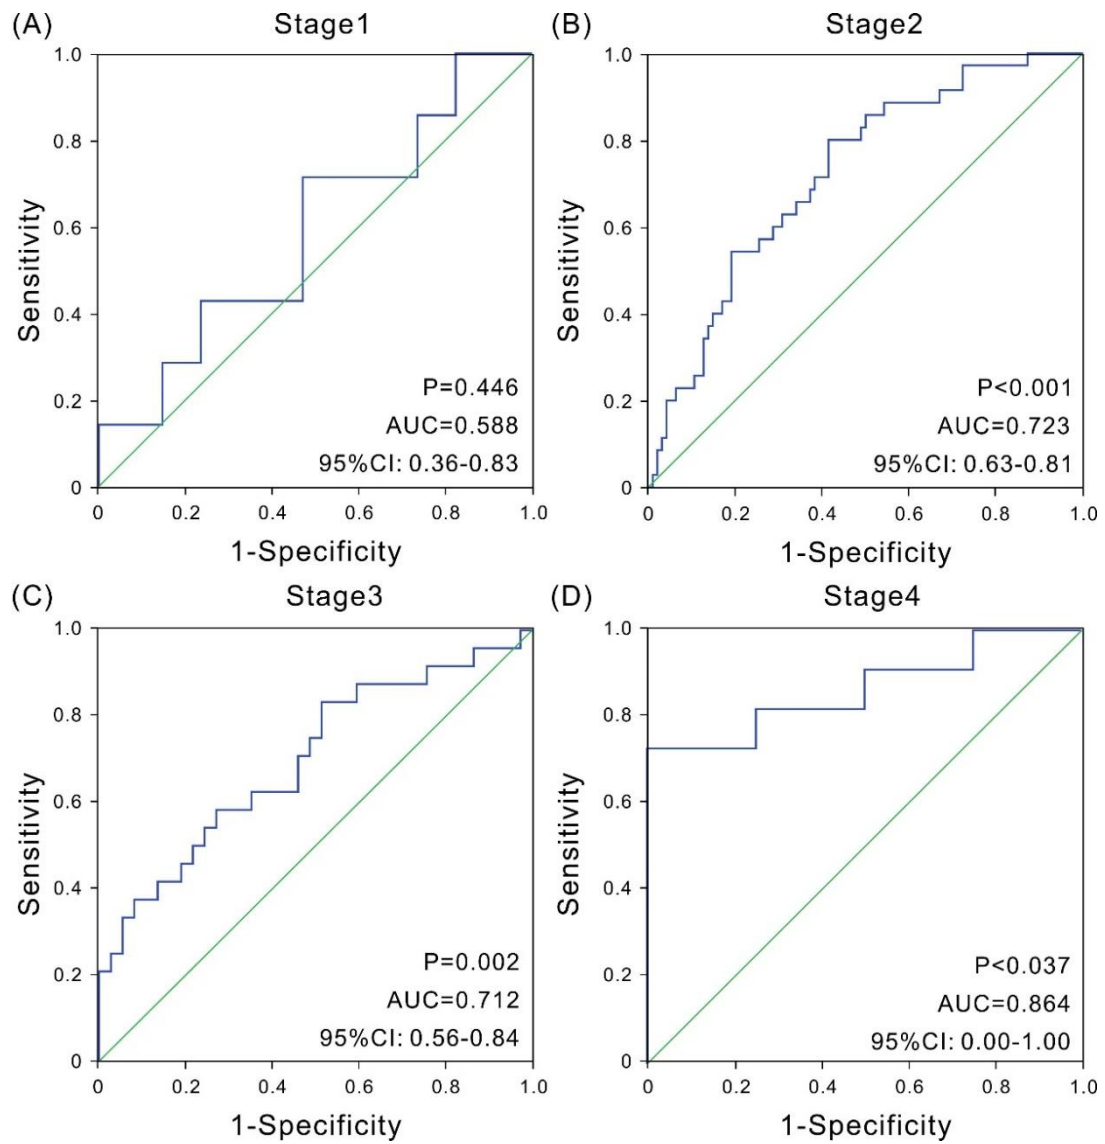

**Supplementary Fig S5. ROC analysis of sensitivity and specificity by the three-lncRNA risk score in predicting the overall survival of patients with different breast cancer stages.**

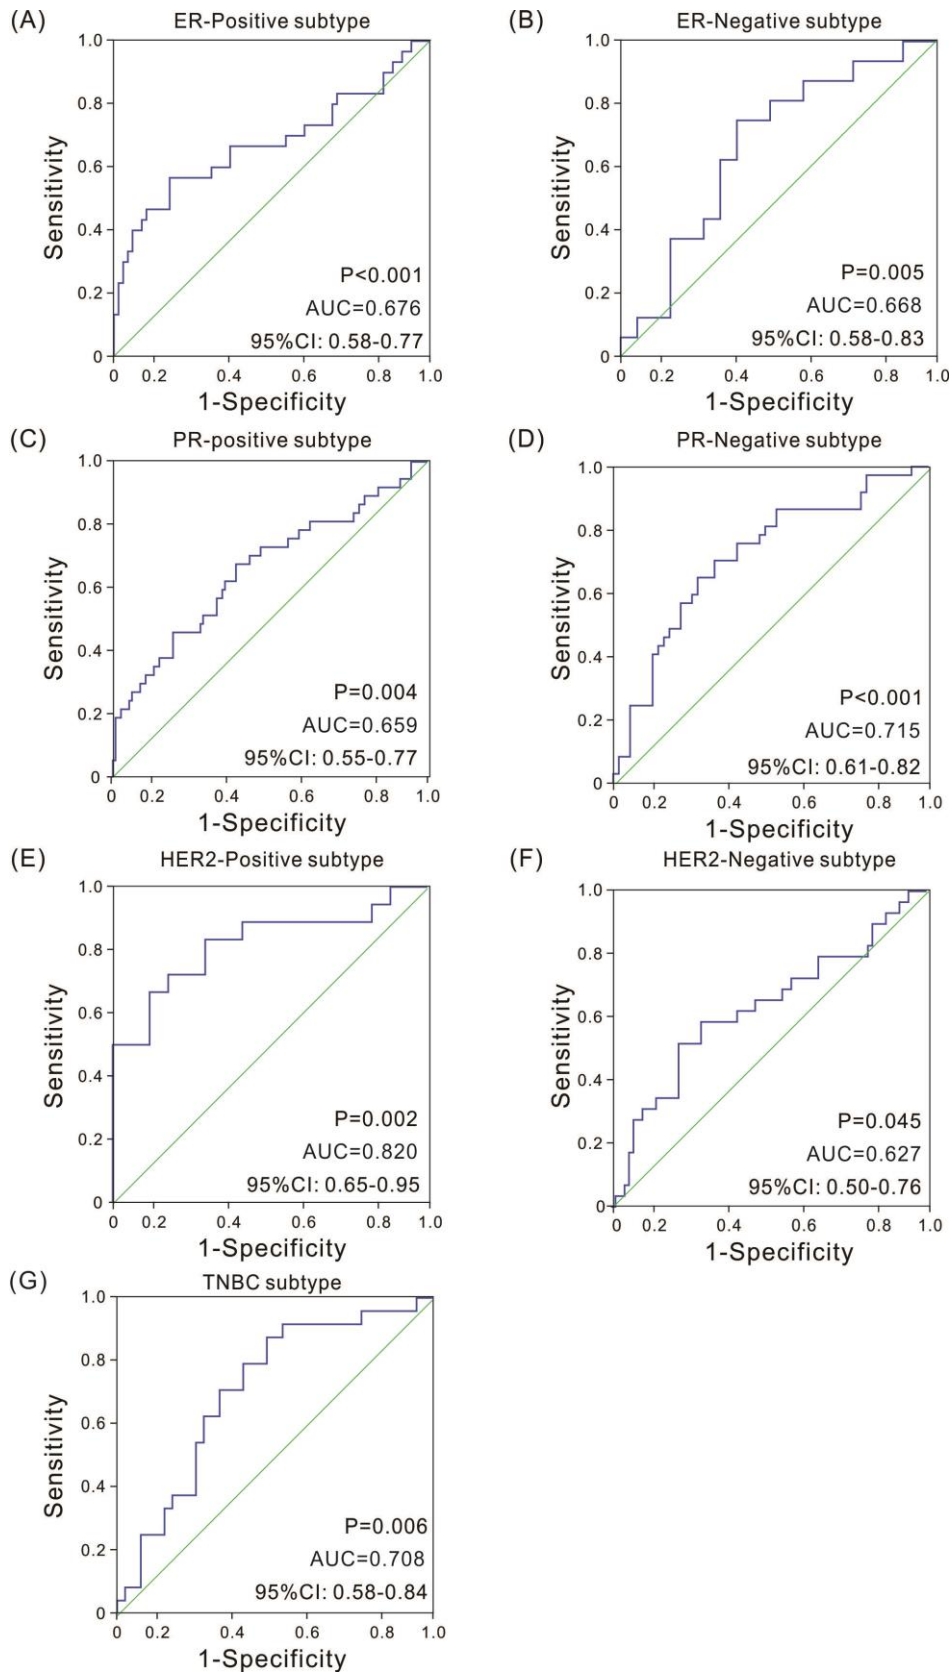

**Supplementary Fig S6. ROC analysis of sensitivity and specificity by the three-lncRNA risk score in predicting the overall survival of patients with different breast cancer subtypes.**

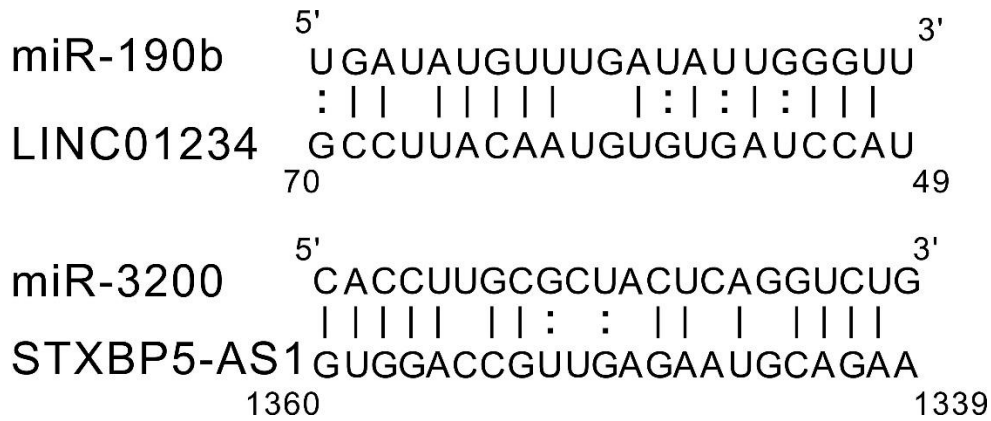

**Supplementary Fig S7. Sequence alignment of *miR-190b* and *LINC01234*, *miR-3200* and *STXBP5-AS1*, respectively.**

**Supplementary Table S1: Sample list and corresponding information of patients in the training and validation sets**

| TCGA_ID             | OS_status <sup>a</sup> | OS_time | Age <sup>b</sup> | ER Status | PR Status | HER2 Status |
|---------------------|------------------------|---------|------------------|-----------|-----------|-------------|
| <b>Training Set</b> |                        |         |                  |           |           |             |
| TCGA-OL-A5D6        | 1                      | 1104    | 71               | Negative  | Negative  | NA          |
| TCGA-E2-A1LH        | 0                      | 3247    | 59               | Negative  | Negative  | Negative    |
| TCGA-A0-A0JI        | 0                      | 1528    | 56               | Positive  | Negative  | Negative    |
| TCGA-A2-A1FV        | 0                      | 714     | 74               | Positive  | Positive  | Negative    |
| TCGA-GM-A2DF        | 0                      | 1299    | 53               | Negative  | Negative  | Negative    |
| TCGA-E9-A243        | 0                      | 519     | 52               | NA        | NA        | NA          |
| TCGA-A0-A03T        | 0                      | 1456    | 42               | Positive  | Positive  | Negative    |
| TCGA-AN-A0XP        | 0                      | 9       | 69               | Positive  | Positive  | Positive    |
| TCGA-A8-A06Y        | 0                      | 791     | 66               | Positive  | Positive  | Negative    |
| TCGA-AR-A250        | 0                      | 2707    | 58               | Positive  | Negative  | Equivocal   |
| TCGA-E2-A159        | 0                      | 762     | 50               | Negative  | Negative  | NA          |
| TCGA-D8-A27G        | 0                      | 409     | 75               | Positive  | Positive  | Equivocal   |
| TCGA-BH-A0C0        | 0                      | 1270    | 62               | Positive  | Positive  | Equivocal   |
| TCGA-B6-A0I2        | 0                      | 4361    | 45               | NA        | NA        | NA          |
| TCGA-EW-A1P8        | 1                      | 239     | 58               | Negative  | Negative  | Negative    |
| TCGA-BH-A1EX        | 1                      | 1508    | 67               | Positive  | Positive  | Positive    |
| TCGA-C8-A26Y        | 0                      | 13      | 90               | Negative  | Negative  | Negative    |
| TCGA-AC-A2QI        | 0                      | 28      | 76               | Positive  | Negative  | Negative    |
| TCGA-A0-A0J6        | 0                      | 1140    | 61               | Negative  | Negative  | Negative    |
| TCGA-D8-A13Z        | 0                      | 635     | 51               | Negative  | Negative  | Negative    |
| TCGA-AR-A5QM        | 0                      | 1665    | 62               | Positive  | Positive  | Equivocal   |
| TCGA-BH-A0B7        | 0                      | 1733    | 42               | Positive  | Positive  | Positive    |
| TCGA-AC-A3BB        | 0                      | 30      | 46               | Positive  | Positive  | Negative    |
| TCGA-AQ-A04L        | 0                      | 3957    | 48               | Positive  | Negative  | Positive    |
| TCGA-LD-A7W5        | 0                      | 124     | 52               | Positive  | Positive  | Negative    |

|              |   |      |    |          |          |           |
|--------------|---|------|----|----------|----------|-----------|
| TCGA-E2-A14S | 0 | 1009 | 65 | Positive | Positive | Equivocal |
| TCGA-EW-A1PH | 0 | 607  | 52 | Negative | Negative | Negative  |
| TCGA-C8-A1HM | 0 | 70   | 74 | Positive | Positive | Negative  |
| TCGA-AR-A2LE | 0 | 4356 | 69 | Positive | Negative | NA        |
| TCGA-MS-A51U | 0 | 85   | 44 | Positive | Positive | Negative  |
| TCGA-A8-A08H | 0 | 0    | 66 | Positive | Positive | Positive  |
| TCGA-B6-A402 | 0 | 1651 | 47 | Negative | Negative | Negative  |
| TCGA-A7-A0CH | 0 | 1079 | 79 | NA       | NA       | NA        |
| TCGA-C8-A133 | 0 | 0    | 65 | Positive | Positive | NA        |
| TCGA-E9-A22D | 0 | 0    | 38 | Positive | Positive | Positive  |
| TCGA-BH-A0DP | 0 | 476  | 60 | Positive | Positive | Negative  |
| TCGA-A2-A0YM | 0 | 965  | 67 | Negative | Negative | NA        |
| TCGA-E2-A1IJ | 0 | 865  | 57 | Positive | Positive | Equivocal |
| TCGA-BH-A0EE | 0 | 943  | 68 | Negative | Negative | Positive  |
| TCGA-D8-A1X8 | 0 | 783  | 62 | Positive | NA       | Negative  |
| TCGA-S3-AA14 | 0 | 218  | 47 | Positive | Positive | Positive  |
| TCGA-B6-A0WW | 1 | 558  | 58 | Positive | Positive | NA        |
| TCGA-A2-A4S3 | 0 | 666  | 59 | Positive | Positive | Negative  |
| TCGA-B6-A0RN | 0 | 5261 | 60 | Negative | Negative | NA        |
| TCGA-A0-A03L | 0 | 2442 | 34 | Positive | Positive | Positive  |
| TCGA-E9-A1N9 | 0 | 399  | 58 | Negative | Positive | Positive  |
| TCGA-A8-A09M | 0 | 1006 | 75 | Positive | Positive | Negative  |
| TCGA-D8-A27P | 0 | 23   | 64 | Positive | Positive | Negative  |
| TCGA-BH-A0H7 | 0 | 702  | 65 | Positive | Positive | Negative  |
| TCGA-AR-A1AX | 0 | 1890 | 64 | Positive | Positive | Positive  |
| TCGA-E9-A1N6 | 0 | 410  | 52 | Positive | Positive | Positive  |
| TCGA-AR-A24S | 0 | 2976 | 61 | Positive | Positive | Negative  |
| TCGA-A7-A4SF | 0 | 545  | 54 | Positive | Negative | Positive  |
| TCGA-AN-A04C | 0 | 54   | 51 | Negative | Negative | Positive  |
| TCGA-XX-A89A | 0 | 278  | 68 | Positive | Positive | Negative  |
| TCGA-A2-A0D0 | 0 | 643  | 60 | Negative | Negative | Negative  |
| TCGA-A2-A0CR | 0 | 3283 | 54 | Positive | Positive | Negative  |
| TCGA-A7-A4SC | 0 | 446  | 62 | Positive | Negative | Equivocal |
| TCGA-E9-A5UP | 0 | 438  | 63 | NA       | NA       | NA        |
| TCGA-C8-A12Z | 0 | 12   | 45 | Negative | Negative | Positive  |
| TCGA-E9-A1NE | 0 | 1088 | 28 | Positive | Positive | Negative  |
| TCGA-AN-A0G0 | 0 | 16   | 56 | Negative | Negative | Negative  |
| TCGA-E2-A2P6 | 0 | 168  | 77 | Positive | Positive | NA        |
| TCGA-A2-A04W | 0 | 1948 | 50 | Negative | Negative | Positive  |
| TCGA-C8-A3M8 | 0 | 7    | 68 | Positive | Positive | Positive  |
| TCGA-A8-A08B | 0 | 1156 | 52 | Positive | Negative | Positive  |
| TCGA-A8-A093 | 0 | 546  | 61 | Positive | Positive | Negative  |
| TCGA-AN-A0FY | 0 | 10   | 55 | Positive | Positive | Negative  |
| TCGA-B6-A40C | 0 | 2164 | 51 | Positive | Positive | Negative  |



|              |   |      |    |          |          |           |
|--------------|---|------|----|----------|----------|-----------|
| TCGA-A7-A13G | 0 | 718  | 79 | Positive | Positive | Negative  |
| TCGA-AR-A24W | 0 | 991  | 55 | Positive | Positive | Negative  |
| TCGA-D8-A1JU | 0 | 447  | 51 | Positive | Positive | Negative  |
| TCGA-E2-A140 | 0 | 1359 | 76 | Positive | Positive | Equivocal |
| TCGA-A8-A08R | 0 | 30   | 52 | Negative | Negative | Negative  |
| TCGA-BH-A0DH | 0 | 1156 | 63 | Positive | Positive | Negative  |
| TCGA-BH-A0H5 | 0 | 1080 | 45 | Positive | Positive | NA        |
| TCGA-C8-A137 | 0 | 125  | 34 | Negative | Negative | Positive  |
| TCGA-A8-A06U | 1 | 883  | 80 | Positive | Positive | Positive  |
| TCGA-OL-A66J | 0 | 1996 | 80 | Positive | Positive | NA        |
| TCGA-A7-A0D9 | 0 | 1139 | 37 | Positive | Negative | Negative  |
| TCGA-GM-A2DI | 0 | 1883 | 52 | Negative | Negative | NA        |
| TCGA-LL-A8F5 | 0 | 189  | 61 | Positive | Negative | Negative  |
| TCGA-A7-A5ZX | 0 | 336  | 48 | Positive | Positive | Negative  |
| TCGA-GI-A2C8 | 0 | 225  | 63 | Positive | Positive | Negative  |
| TCGA-BH-A0BD | 0 | 554  | 47 | Positive | Positive | Negative  |
| TCGA-B6-A0RI | 0 | 7126 | 44 | Positive | Positive | NA        |
| TCGA-A0-A0J2 | 0 | 997  | 41 | Negative | Negative | Equivocal |
| TCGA-A2-A25C | 0 | 523  | 50 | Positive | Positive | Negative  |
| TCGA-A2-A0D4 | 0 | 767  | 37 | Positive | Positive | Negative  |
| TCGA-AC-A23H | 1 | 174  | 90 | Positive | Negative | Positive  |
| TCGA-A8-A08X | 0 | 1308 | 43 | Negative | Negative | Positive  |
| TCGA-S3-AA11 | 0 | 169  | 67 | Positive | Positive | Equivocal |
| TCGA-A7-A2KD | 0 | 679  | 53 | Positive | Positive | Positive  |
| TCGA-AR-A5QQ | 1 | 322  | 68 | Negative | Negative | Negative  |
| TCGA-D8-A145 | 0 | 410  | 80 | Positive | Positive | Equivocal |
| TCGA-A0-A124 | 0 | 3120 | 38 | Negative | Negative | Negative  |
| TCGA-A2-A0CY | 0 | 1673 | 63 | Positive | Positive | Negative  |
| TCGA-A8-A0AD | 0 | 1157 | 83 | Positive | Positive | Negative  |
| TCGA-B6-A0WX | 1 | 653  | 40 | Negative | Negative | NA        |
| TCGA-AC-A23C | 0 | 29   | 62 | Positive | Positive | Positive  |
| TCGA-BH-A0BP | 0 | 1481 | 76 | Positive | Positive | Negative  |
| TCGA-PE-A5DC | 1 | 1430 | 72 | Positive | Positive | Positive  |
| TCGA-A2-A0SV | 1 | 825  | 63 | Positive | Positive | Equivocal |
| TCGA-BH-A0W3 | 0 | 728  | 58 | Positive | Positive | Equivocal |
| TCGA-E2-A14P | 0 | 1246 | 79 | Negative | Negative | Positive  |
| TCGA-E2-A10F | 0 | 878  | 47 | Positive | Positive | Equivocal |
| TCGA-D8-A1JN | 0 | 620  | 80 | Positive | Positive | NA        |
| TCGA-A0-A0JB | 0 | 1542 | 50 | Positive | Positive | Negative  |
| TCGA-E2-A105 | 0 | 1308 | 79 | Positive | Positive | Equivocal |
| TCGA-E9-A3X8 | 0 | 478  | 48 | Positive | Positive | Positive  |
| TCGA-BH-A0B4 | 0 | 1191 | 65 | Positive | Positive | Equivocal |
| TCGA-AN-A046 | 0 | 10   | 68 | Positive | Positive | Negative  |
| TCGA-A8-A09G | 0 | 0    | 79 | Positive | Negative | Positive  |

|              |   |      |    |          |          |           |
|--------------|---|------|----|----------|----------|-----------|
| TCGA-AR-A0TP | 0 | 3386 | 43 | Positive | Negative | Negative  |
| TCGA-C8-A26Z | 0 | 252  | 59 | Positive | Positive | Negative  |
| TCGA-A0-A030 | 1 | 2483 | 69 | Positive | Positive | Negative  |
| TCGA-OL-A6V0 | 0 | 858  | 43 | Negative | Negative | Negative  |
| TCGA-GM-A2DK | 0 | 1896 | 58 | Positive | Negative | Negative  |
| TCGA-E9-A2JS | 1 | 904  | 72 | NA       | NA       | NA        |
| TCGA-EW-A424 | 0 | 715  | 51 | Positive | Positive | Positive  |
| TCGA-A7-A3J0 | 0 | 313  | 62 | Positive | Positive | Negative  |
| TCGA-E2-A156 | 0 | 726  | 61 | Positive | Positive | Negative  |
| TCGA-BH-A1FB | 1 | 3669 | 60 | Positive | Positive | Negative  |
| TCGA-A7-A0DA | 0 | 1085 | 62 | Negative | Negative | Negative  |
| TCGA-A8-A085 | 0 | 1124 | 44 | Positive | Positive | Negative  |
| TCGA-E9-A1R4 | 0 | 186  | 66 | NA       | NA       | NA        |
| TCGA-AR-A0U0 | 0 | 1988 | 73 | Negative | Negative | NA        |
| TCGA-E2-A576 | 0 | 578  | 69 | Positive | Positive | Equivocal |
| TCGA-AN-A0XW | 0 | 170  | 36 | Positive | Positive | Positive  |
| TCGA-E2-A10C | 0 | 1220 | 54 | Positive | Positive | Negative  |
| TCGA-AR-A0TQ | 0 | 2240 | 27 | Positive | Negative | Equivocal |
| TCGA-BH-A0RX | 0 | 170  | 59 | Negative | Negative | Negative  |
| TCGA-BH-A0AW | 0 | 622  | 56 | Positive | Negative | Positive  |
| TCGA-C8-A1HJ | 0 | 5    | 53 | Negative | Negative | Negative  |
| TCGA-AC-A23G | 0 | 330  | 76 | Positive | Positive | Positive  |
| TCGA-B6-A0I6 | 1 | 997  | 49 | Negative | Negative | NA        |
| TCGA-EW-A1P7 | 0 | 915  | 59 | Negative | Negative | Equivocal |
| TCGA-W8-A86G | 0 | 161  | 66 | Positive | Positive | Negative  |
| TCGA-B6-A0RP | 1 | 3126 | 73 | Positive | Positive | NA        |
| TCGA-A8-A07E | 0 | 608  | 81 | Positive | Positive | Negative  |
| TCGA-E2-A1IU | 0 | 337  | 60 | Positive | Positive | Negative  |
| TCGA-AR-A24H | 0 | 4894 | 65 | Positive | Positive | Negative  |
| TCGA-AC-A62Y | 0 | 530  | 79 | Positive | Positive | Negative  |
| TCGA-C8-A26X | 0 | 11   | 58 | Negative | Negative | Negative  |
| TCGA-A2-A0CU | 1 | 158  | 73 | Positive | Positive | Equivocal |
| TCGA-AC-A62X | 0 | 34   | 72 | Positive | Negative | NA        |
| TCGA-A8-A08G | 0 | 607  | 41 | Positive | Positive | Positive  |
| TCGA-C8-A134 | 0 | 34   | 52 | Negative | Negative | Equivocal |
| TCGA-A2-A0SY | 0 | 1347 | 62 | Positive | Positive | NA        |
| TCGA-LL-A73Z | 1 | 227  | 55 | Positive | Positive | Equivocal |
| TCGA-A2-A0E0 | 0 | 2442 | 54 | Positive | Positive | Negative  |
| TCGA-A2-A0EX | 0 | 752  | 46 | Positive | Positive | Negative  |
| TCGA-E9-A1R5 | 0 | 42   | 63 | NA       | NA       | NA        |
| TCGA-OL-A5RV | 0 | 1062 | 43 | Positive | Positive | NA        |
| TCGA-E2-A15L | 0 | 626  | 65 | Positive | Positive | Equivocal |
| TCGA-BH-A18M | 1 | 2207 | 39 | Positive | Positive | Positive  |
| TCGA-D8-A27F | 0 | 488  | 40 | Negative | Negative | Negative  |

|              |   |      |    |          |          |           |
|--------------|---|------|----|----------|----------|-----------|
| TCGA-D8-A147 | 0 | 584  | 45 | Negative | Negative | Negative  |
| TCGA-A8-A076 | 0 | 1642 | 66 | Positive | Positive | Positive  |
| TCGA-BH-A0HW | 0 | 1561 | 62 | Positive | Negative | Equivocal |
| TCGA-AR-A2LH | 1 | 616  | 55 | Negative | Negative | Equivocal |
| TCGA-OL-A66N | 0 | 792  | 59 | Positive | Negative | NA        |
| TCGA-BH-A18V | 1 | 1556 | 48 | Negative | Negative | Negative  |
| TCGA-E2-A1IN | 0 | 675  | 60 | Positive | Positive | Negative  |
| TCGA-A2-A0T4 | 0 | 624  | 62 | Positive | Positive | Equivocal |
| TCGA-AR-A24Q | 0 | 3172 | 49 | Positive | Negative | Negative  |
| TCGA-B6-A0X7 | 1 | 1791 | 62 | Positive | Positive | NA        |
| TCGA-BH-A0H0 | 0 | 461  | 69 | Positive | Positive | Negative  |
| TCGA-A2-A25E | 0 | 2796 | 34 | Positive | Positive | Equivocal |
| TCGA-AN-A0FL | 0 | 231  | 62 | Negative | Negative | Positive  |
| TCGA-A7-A0CG | 0 | 1043 | 78 | Positive | Negative | Negative  |
| TCGA-E9-A1RG | 0 | 647  | 62 | NA       | NA       | NA        |
| TCGA-D8-A13Y | 0 | 362  | 52 | Positive | Positive | Negative  |
| TCGA-A2-A04P | 1 | 548  | 36 | Negative | Negative | NA        |
| TCGA-A8-A07I | 0 | 426  | 69 | Positive | Negative | Positive  |
| TCGA-LL-A5Y0 | 0 | 440  | 50 | Negative | Negative | Negative  |
| TCGA-C8-A138 | 0 | 114  | 54 | Positive | Negative | Equivocal |
| TCGA-E2-A14T | 0 | 1013 | 52 | Positive | Positive | Negative  |
| TCGA-E2-A1IK | 0 | 689  | 71 | Positive | Positive | Negative  |
| TCGA-C8-A12X | 0 | 385  | 62 | Positive | Positive | Negative  |
| TCGA-A2-A0EP | 0 | 3273 | 56 | Positive | Negative | Negative  |
| TCGA-E9-A244 | 0 | 21   | 54 | NA       | NA       | NA        |
| TCGA-OL-A66P | 0 | 428  | 75 | Negative | Negative | NA        |
| TCGA-GI-A2C9 | 0 | 3342 | 58 | Negative | Negative | Negative  |
| TCGA-BH-A0BV | 0 | 1519 | 78 | Positive | Positive | Negative  |
| TCGA-AR-A0U3 | 0 | 3468 | 59 | Positive | Positive | Negative  |
| TCGA-BH-A18K | 1 | 2763 | 46 | Positive | Positive | Negative  |
| TCGA-E2-A570 | 0 | 931  | 47 | Positive | Positive | Equivocal |
| TCGA-D8-A143 | 0 | 431  | 51 | Negative | Negative | Negative  |
| TCGA-LL-A5YP | 0 | 450  | 49 | Positive | Negative | Negative  |
| TCGA-A0-A12A | 0 | 2755 | 47 | Positive | Positive | Negative  |
| TCGA-BH-A42T | 0 | 30   | 75 | Positive | Positive | Positive  |
| TCGA-B6-A0RH | 0 | 5749 | 51 | Positive | Positive | NA        |
| TCGA-OL-A5RU | 0 | 1219 | 63 | Positive | Positive | NA        |
| TCGA-BH-A1F6 | 1 | 2965 | 51 | Negative | Negative | Negative  |
| TCGA-AC-A2FM | 1 | 792  | 87 | NA       | NA       | NA        |
| TCGA-GM-A3XN | 0 | 2019 | 44 | Positive | Positive | Negative  |
| TCGA-A8-A091 | 0 | 1004 | 61 | Positive | Negative | Negative  |
| TCGA-A8-A094 | 0 | 0    | 75 | Positive | Negative | Negative  |
| TCGA-AN-A0AM | 0 | 5    | 56 | Positive | Negative | Negative  |
| TCGA-AC-A6NO | 0 | 51   | 43 | Positive | Positive | Negative  |

|              |   |      |    |          |          |           |
|--------------|---|------|----|----------|----------|-----------|
| TCGA-E2-A572 | 0 | 831  | 72 | Positive | Positive | Equivocal |
| TCGA-B6-A0RQ | 1 | 4273 | 68 | Positive | Positive | NA        |
| TCGA-A2-A0CQ | 0 | 2695 | 62 | Positive | Positive | Equivocal |
| TCGA-C8-A1HI | 0 | 343  | 40 | Positive | Positive | Negative  |
| TCGA-BH-A0B2 | 0 | 1242 | 43 | Positive | Positive | Negative  |
| TCGA-AN-A0FJ | 0 | 242  | 59 | Positive | Negative | Positive  |
| TCGA-A8-A070 | 0 | 304  | 51 | Negative | Negative | Negative  |
| TCGA-E9-A1RH | 0 | 1052 | 63 | NA       | NA       | NA        |
| TCGA-GM-A3XG | 0 | 1330 | 46 | Positive | Positive | Negative  |
| TCGA-A8-A06N | 0 | 0    | 66 | Positive | Negative | Negative  |
| TCGA-AR-A24K | 0 | 1548 | 46 | Positive | Positive | Equivocal |
| TCGA-A2-A0CL | 0 | 1964 | 37 | Positive | Positive | Negative  |
| TCGA-AR-A1AU | 0 | 2318 | 39 | Positive | Positive | Equivocal |
| TCGA-AR-A2LR | 0 | 620  | 49 | Negative | Negative | Negative  |
| TCGA-A7-A5ZW | 0 | 326  | 47 | Positive | Positive | Negative  |
| TCGA-A8-A086 | 0 | 396  | 59 | Positive | Positive | Negative  |
| TCGA-E9-A2JT | 0 | 23   | 63 | NA       | NA       | NA        |
| TCGA-E9-A1NI | 0 | 300  | 51 | Positive | Positive | Negative  |
| TCGA-BH-A1E0 | 1 | 2798 | 68 | Positive | Positive | Negative  |
| TCGA-A1-A0SF | 0 | 1463 | 54 | Positive | Positive | Negative  |
| TCGA-D8-A1X7 | 0 | 509  | 40 | Positive | Positive | Negative  |
| TCGA-A0-A03U | 1 | 1793 | 31 | Negative | Negative | Negative  |
| TCGA-A0-A1KQ | 0 | 1882 | 84 | Positive | Positive | Negative  |
| TCGA-E9-A295 | 0 | 22   | 71 | Positive | Positive | Positive  |
| TCGA-A7-A0CE | 0 | 1074 | 57 | Negative | Negative | Equivocal |
| TCGA-A2-A1G6 | 0 | 501  | 50 | Negative | Negative | Negative  |
| TCGA-E2-A15T | 0 | 456  | 65 | Positive | Positive | Equivocal |
| TCGA-A8-A0A2 | 0 | 579  | 66 | Positive | Positive | Negative  |
| TCGA-LD-A9QF | 0 | 266  | 73 | Negative | Negative | Positive  |
| TCGA-BH-A0B0 | 0 | 1428 | 56 | Positive | Positive | Negative  |
| TCGA-BH-A0D0 | 0 | 525  | 78 | Positive | Positive | Negative  |
| TCGA-A2-A0EM | 0 | 3094 | 73 | Positive | Positive | NA        |
| TCGA-A0-A0JC | 0 | 1547 | 64 | Positive | Positive | Negative  |
| TCGA-AR-A24V | 0 | 2596 | 52 | Positive | Positive | Negative  |
| TCGA-EW-A2FR | 0 | 1673 | 59 | Negative | Negative | Equivocal |
| TCGA-A8-A095 | 0 | 1277 | 45 | Positive | Positive | Negative  |
| TCGA-E9-A54X | 0 | 375  | 85 | Positive | Positive | Negative  |
| TCGA-GM-A2DM | 0 | 2331 | 57 | Positive | Positive | Negative  |
| TCGA-EW-A10V | 0 | 789  | 56 | Negative | Negative | Negative  |
| TCGA-EW-A2FS | 0 | 1604 | 41 | Positive | Negative | Negative  |
| TCGA-LL-A440 | 0 | 759  | 61 | Positive | Positive | Equivocal |
| TCGA-GM-A2D9 | 1 | 1812 | 69 | Positive | Positive | NA        |
| TCGA-A2-A0YE | 0 | 554  | 48 | Negative | Negative | Negative  |
| TCGA-E9-A1R3 | 0 | 64   | 70 | NA       | NA       | NA        |

|              |   |      |    |          |          |           |
|--------------|---|------|----|----------|----------|-----------|
| TCGA-A2-A0SX | 0 | 1534 | 48 | Negative | Negative | Negative  |
| TCGA-BH-A5J0 | 0 | 715  | 63 | Positive | Positive | Negative  |
| TCGA-A8-A0A4 | 0 | 396  | 73 | Positive | Positive | Negative  |
| TCGA-AN-A0X0 | 0 | 375  | 59 | Positive | Negative | Negative  |
| TCGA-AR-A0TX | 0 | 1972 | 64 | Positive | Positive | Positive  |
| TCGA-BH-A18I | 0 | 220  | 53 | Positive | Positive | Positive  |
| TCGA-BH-A0E7 | 0 | 1363 | 79 | Positive | Positive | Negative  |
| TCGA-A2-A1G0 | 0 | 616  | 49 | Positive | Positive | Equivocal |
| TCGA-A2-A0EW | 0 | 905  | 53 | Positive | Positive | Negative  |
| TCGA-E9-A1NA | 0 | 1112 | 58 | Positive | Positive | Positive  |
| TCGA-D8-A1XV | 0 | 461  | 84 | Positive | Positive | Equivocal |
| TCGA-BH-A0BR | 0 | 1633 | 59 | Positive | Positive | Negative  |
| TCGA-D8-A73X | 0 | 368  | 53 | Positive | Positive | Negative  |
| TCGA-B6-A0IJ | 0 | 5383 | 42 | Positive | Positive | NA        |
| TCGA-D8-A27R | 0 | 307  | 41 | Positive | Positive | Equivocal |
| TCGA-BH-A1F5 | 1 | 2712 | 62 | Positive | Positive | Negative  |
| TCGA-A2-A1G1 | 0 | 584  | 85 | Negative | Negative | Equivocal |
| TCGA-C8-A1HE | 0 | 375  | 59 | Positive | Positive | Equivocal |
| TCGA-BH-A5IZ | 0 | 567  | 51 | Positive | Negative | Negative  |
| TCGA-E9-A22B | 0 | 692  | 71 | Positive | Negative | Negative  |
| TCGA-E9-A1QZ | 0 | 362  | 61 | NA       | NA       | NA        |
| TCGA-EW-A1P3 | 0 | 1611 | 48 | Positive | Positive | Negative  |
| TCGA-BH-A0W4 | 0 | 759  | 46 | Positive | Positive | Negative  |
| TCGA-BH-A8FZ | 0 | 574  | 58 | Positive | Positive | Equivocal |
| TCGA-AN-A0AK | 0 | 224  | 76 | Positive | Negative | Positive  |
| TCGA-A2-A0CS | 0 | 2298 | 73 | Positive | Positive | Equivocal |
| TCGA-OL-A66I | 0 | 714  | 36 | Negative | Negative | NA        |
| TCGA-E2-A1LG | 0 | 574  | 50 | Negative | Negative | Equivocal |
| TCGA-PL-A8LX | 0 | 5    | 35 | NA       | NA       | NA        |
| TCGA-BH-A1FD | 1 | 1009 | 68 | Positive | Positive | Negative  |
| TCGA-OL-A5RZ | 0 | 679  | 57 | Positive | Negative | NA        |
| TCGA-E2-A1L6 | 0 | 1648 | 44 | Positive | Positive | Negative  |
| TCGA-A7-A26F | 0 | 738  | 55 | Negative | Negative | Equivocal |
| TCGA-EW-A1IZ | 0 | 554  | 53 | Positive | Positive | Negative  |
| TCGA-D8-A1XR | 0 | 482  | 56 | Positive | Positive | Negative  |
| TCGA-A8-A07S | 0 | 243  | 73 | Positive | Negative | Negative  |
| TCGA-A0-A0JM | 0 | 2184 | 40 | Positive | Positive | Positive  |
| TCGA-B6-A0RL | 1 | 2469 | 60 | Positive | Positive | NA        |
| TCGA-S3-AA0Z | 0 | 511  | 63 | Positive | Positive | Equivocal |
| TCGA-AR-A1AM | 0 | 2315 | 52 | Positive | Positive | Equivocal |
| TCGA-E9-A1R7 | 0 | 645  | 64 | NA       | NA       | NA        |
| TCGA-D8-A1X9 | 0 | 727  | 66 | Positive | Positive | NA        |
| TCGA-C8-A12N | 0 | 358  | 58 | Positive | Positive | Negative  |
| TCGA-AN-A0FS | 0 | 191  | 55 | Positive | Negative | Positive  |

|              |   |      |    |          |          |           |
|--------------|---|------|----|----------|----------|-----------|
| TCGA-A2-A0YD | 0 | 769  | 63 | Positive | Positive | NA        |
| TCGA-OL-A66L | 0 | 1301 | 71 | Positive | Positive | NA        |
| TCGA-E9-A5FL | 0 | 24   | 65 | Negative | Negative | Negative  |
| TCGA-A8-A082 | 0 | 549  | 58 | Positive | Positive | Negative  |
| TCGA-A8-A0A1 | 0 | 365  | 84 | Positive | Positive | Negative  |
| TCGA-BH-A0DL | 0 | 1467 | 64 | Positive | Negative | Negative  |
| TCGA-A2-A4S1 | 0 | 820  | 66 | Positive | Negative | Negative  |
| TCGA-BH-A0BC | 0 | 974  | 60 | Positive | Positive | Negative  |
| TCGA-B6-A0IC | 1 | 1542 | 90 | Positive | Positive | NA        |
| TCGA-BH-A0B6 | 0 | 1732 | 47 | Positive | Positive | Positive  |
| TCGA-C8-A130 | 0 | 96   | 52 | Positive | Positive | Equivocal |
| TCGA-BH-A0HO | 0 | 76   | 48 | Positive | Positive | Negative  |
| TCGA-A1-A0SD | 0 | 437  | 59 | Positive | Positive | Negative  |
| TCGA-BH-A0DI | 0 | 673  | 63 | Positive | Positive | Negative  |
| TCGA-A8-A09X | 1 | 426  | 62 | Negative | Negative | Negative  |
| TCGA-A8-A08Z | 0 | 1217 | 76 | Positive | Positive | Negative  |
| TCGA-A1-A0SH | 0 | 1437 | 39 | Negative | Positive | Equivocal |
| TCGA-A2-A0T0 | 0 | 533  | 59 | Negative | Negative | Negative  |
| TCGA-A8-A09I | 0 | 1371 | 84 | Positive | Positive | Positive  |
| TCGA-B6-A0R0 | 0 | 4929 | 71 | Positive | Positive | NA        |
| TCGA-BH-A2L8 | 0 | 612  | 45 | Positive | Positive | Negative  |
| TCGA-GM-A2DB | 0 | 1616 | 62 | Negative | Negative | Negative  |
| TCGA-E9-A1RB | 1 | 976  | 40 | NA       | NA       | NA        |
| TCGA-D8-A140 | 0 | 403  | 62 | Positive | Positive | Positive  |
| TCGA-A7-A13E | 1 | 614  | 62 | Positive | Negative | Equivocal |
| TCGA-E2-A1IG | 0 | 997  | 45 | Positive | Positive | Negative  |
| TCGA-A2-A3XW | 0 | 1505 | 42 | Positive | Negative | Negative  |
| TCGA-E9-A3QA | 0 | 918  | 33 | NA       | NA       | NA        |
| TCGA-BH-A0BF | 0 | 782  | 56 | Positive | Positive | Negative  |
| TCGA-BH-A0H6 | 0 | 747  | 82 | Positive | Positive | Negative  |
| TCGA-D8-A1XG | 0 | 448  | 86 | Positive | Negative | Negative  |
| TCGA-AC-A23E | 0 | 72   | 50 | Positive | Positive | NA        |
| TCGA-AR-A24P | 0 | 84   | 47 | Positive | Positive | Equivocal |
| TCGA-LL-A50Y | 0 | 762  | 84 | Positive | Positive | Equivocal |
| TCGA-AC-A2FB | 0 | 1234 | 65 | Positive | Positive | Positive  |
| TCGA-A7-A3IZ | 0 | 322  | 62 | Positive | Negative | Equivocal |
| TCGA-A0-A0J8 | 0 | 680  | 61 | Positive | Positive | Negative  |
| TCGA-EW-A1P1 | 0 | 1210 | 68 | Negative | Negative | Equivocal |
| TCGA-E9-A1ND | 0 | 383  | 75 | Negative | Negative | Positive  |
| TCGA-BH-A1ET | 1 | 2520 | 55 | Positive | Positive | Negative  |
| TCGA-E9-A226 | 0 | 1038 | 45 | NA       | NA       | NA        |
| TCGA-OL-A5S0 | 0 | 620  | 66 | Positive | Negative | NA        |
| TCGA-A0-A126 | 0 | 3307 | 39 | Positive | Positive | Negative  |
| TCGA-E9-A22A | 0 | 1189 | 74 | Positive | Negative | Negative  |

|              |   |      |    |          |          |           |
|--------------|---|------|----|----------|----------|-----------|
| TCGA-A8-A06X | 1 | 943  | 77 | Positive | Negative | Positive  |
| TCGA-A2-A4RX | 0 | 742  | 67 | Positive | Positive | Negative  |
| TCGA-E2-A1LL | 0 | 1309 | 73 | Negative | Negative | Negative  |
| TCGA-A8-A0A7 | 0 | 30   | 57 | Negative | Negative | Positive  |
| TCGA-EW-A423 | 0 | 309  | 75 | Positive | Positive | Negative  |
| TCGA-B6-A0IP | 0 | 3374 | 74 | Positive | Positive | NA        |
| TCGA-B6-A0X1 | 0 | 5672 | 48 | Negative | Negative | NA        |
| TCGA-A8-A09T | 0 | 579  | 68 | Positive | Positive | Negative  |
| TCGA-E2-A10B | 0 | 1141 | 67 | Positive | Positive | Equivocal |
| TCGA-E9-A1NH | 0 | 0    | 71 | Positive | Positive | Negative  |
| TCGA-BH-A1FN | 1 | 2192 | 34 | Positive | Positive | NA        |
| TCGA-EW-A1P5 | 0 | 703  | 77 | Positive | Positive | Negative  |
| TCGA-BH-A1FH | 1 | 1123 | 47 | Positive | Negative | NA        |
| TCGA-UU-A93S | 1 | 116  | 63 | Negative | Negative | Positive  |
| TCGA-BH-A0B9 | 0 | 1572 | 44 | Negative | Negative | Negative  |
| TCGA-WT-AB44 | 0 | 791  | 77 | Positive | Positive | Negative  |
| TCGA-E2-A1IL | 0 | 118  | 78 | Positive | Positive | Negative  |
| TCGA-A8-A07G | 0 | 577  | 65 | Positive | Positive | Negative  |
| TCGA-A2-A0YC | 0 | 990  | 59 | Positive | Positive | NA        |
| TCGA-S3-A6ZG | 0 | 207  | 71 | Positive | Positive | Negative  |
| TCGA-BH-A1FE | 1 | 2273 | 31 | Positive | Positive | NA        |
| TCGA-E2-A1L7 | 0 | 834  | 40 | Negative | Negative | Negative  |
| TCGA-BH-A0B0 | 0 | 1085 | 54 | Positive | Positive | Negative  |
| TCGA-B6-A408 | 0 | 2072 | 55 | Positive | Positive | Equivocal |
| TCGA-BH-AB28 | 0 | 185  | 53 | Positive | Positive | Negative  |
| TCGA-C8-A1HF | 0 | 332  | 48 | Negative | Positive | Positive  |
| TCGA-AN-A0AJ | 0 | 244  | 79 | Positive | Positive | Positive  |
| TCGA-E2-A155 | 0 | 640  | 58 | Positive | Negative | Negative  |
| TCGA-BH-A1F8 | 1 | 749  | 90 | Positive | Positive | Positive  |
| TCGA-A2-A0CT | 0 | 2289 | 71 | Positive | Negative | Equivocal |
| TCGA-C8-A1HK | 0 | 366  | 53 | Negative | Negative | Positive  |
| TCGA-D8-A27K | 0 | 287  | 47 | Positive | Positive | Negative  |
| TCGA-C8-A1H0 | 0 | 0    | 34 | Positive | Positive | Negative  |
| TCGA-LL-A5YM | 0 | 466  | 88 | Positive | Positive | Equivocal |
| TCGA-GM-A2D0 | 0 | 1623 | 54 | Positive | Positive | Negative  |
| TCGA-D8-A1Y2 | 0 | 433  | 71 | Positive | Positive | NA        |
| TCGA-A2-A3XU | 1 | 912  | 35 | Negative | Negative | NA        |
| TCGA-A7-A13H | 0 | 899  | 61 | Positive | Positive | Equivocal |
| TCGA-GM-A4E0 | 0 | 2191 | 67 | Positive | Positive | NA        |
| TCGA-A0-A0JE | 0 | 2335 | 53 | Negative | Negative | Positive  |
| TCGA-C8-A12L | 0 | 363  | 67 | Negative | Negative | Equivocal |
| TCGA-AC-A3YI | 0 | 707  | 74 | Positive | Positive | Positive  |
| TCGA-B6-A0X4 | 1 | 860  | 62 | Positive | Positive | NA        |
| TCGA-A0-A0J7 | 0 | 618  | 71 | Positive | Positive | Negative  |

|              |   |      |    |          |          |                |
|--------------|---|------|----|----------|----------|----------------|
| TCGA-BH-A0EA | 1 | 993  | 72 | Positive | Positive | Negative       |
| TCGA-E9-A1R0 | 0 | 860  | 58 | NA       | NA       | NA             |
| TCGA-EW-A1IY | 0 | 258  | 38 | Positive | Positive | Negative       |
| TCGA-A8-A09C | 0 | 31   | 69 | Positive | Positive | Negative       |
| TCGA-AR-A1AQ | 0 | 1310 | 49 | Negative | Negative | Equivocal      |
| TCGA-EW-A10Y | 0 | 908  | 63 | Positive | Positive | Negative       |
| TCGA-BH-A202 | 0 | 22   | 60 | Positive | Positive | Positive       |
| TCGA-D8-A1JK | 0 | 612  | 90 | Negative | Positive | Negative       |
| TCGA-BH-A18S | 1 | 2009 | 79 | Positive | Positive | Negative       |
| TCGA-A1-A0SB | 0 | 259  | 70 | Positive | Negative | Negative       |
| TCGA-A7-A3J1 | 0 | 343  | 63 | Positive | Positive | Negative       |
| TCGA-AR-A1AY | 0 | 1026 | 65 | Negative | Negative | Negative       |
| TCGA-AN-A0XL | 0 | 10   | 61 | Positive | Positive | Negative       |
| TCGA-A2-A3XS | 1 | 1032 | 62 | Negative | Negative | NA             |
| TCGA-GM-A2DN | 0 | 2352 | 58 | Positive | Positive | Negative       |
| TCGA-A2-A0T5 | 0 | 531  | 39 | Positive | Positive | Negative       |
| TCGA-E2-A1IH | 0 | 1026 | 80 | Positive | Positive | Equivocal      |
| TCGA-AQ-A7U7 | 0 | 304  | 55 | Positive | Positive | Negative       |
| TCGA-EW-A1PA | 0 | 575  | 59 | Positive | Positive | Negative       |
| TCGA-EW-A1J6 | 0 | 875  | 70 | Positive | Positive | Negative       |
| TCGA-D8-A1XM | 0 | 538  | 57 | Positive | Positive | Negative       |
| TCGA-LL-A6FQ | 0 | 80   | 77 | Positive | Positive | Negative       |
| TCGA-BH-A18P | 1 | 921  | 60 | Positive | Negative | Positive       |
| TCGA-E2-A1B4 | 1 | 1004 | 74 | Positive | Positive | Negative       |
| TCGA-BH-A0E2 | 0 | 435  | 49 | Positive | Positive | Negative       |
| TCGA-A2-A0ER | 0 | 2263 | 63 | Positive | Positive | Equivocal      |
| TCGA-E9-A1RD | 0 | 20   | 67 | NA       | NA       | NA             |
| TCGA-A2-A04N | 0 | 3188 | 66 | Positive | Positive | NA             |
| TCGA-AQ-A04H | 0 | 754  | 61 | Positive | Positive | NA             |
| TCGA-A0-A12C | 0 | 1994 | 42 | Positive | Positive | Positive       |
| TCGA-BH-A0DT | 0 | 1170 | 41 | Positive | Positive | Negative       |
| TCGA-S3-AA17 | 0 | 119  | 64 | Positive | Positive | Equivocal      |
| TCGA-BH-A0BS | 0 | 1641 | 55 | Positive | Positive | [NotAvailable] |
| TCGA-AR-A5QP | 0 | 622  | 54 | Positive | Positive | Equivocal      |
| TCGA-C8-A1HN | 0 | 99   | 56 | Positive | Positive | Equivocal      |
| TCGA-A2-A1G4 | 0 | 595  | 71 | Positive | Positive | Negative       |
| TCGA-D8-A1JD | 0 | 552  | 41 | Positive | Positive | Negative       |
| TCGA-E2-A1LI | 0 | 3121 | 57 | Negative | Negative | Equivocal      |
| TCGA-E2-A14N | 0 | 1434 | 37 | Negative | Negative | Negative       |
| TCGA-AN-A041 | 0 | 7    | 29 | Positive | Negative | Positive       |
| TCGA-EW-A1IX | 0 | 1208 | 48 | Positive | Positive | Negative       |
| TCGA-A2-A0CM | 1 | 754  | 40 | Negative | Negative | Negative       |
| TCGA-A8-A09W | 0 | 30   | 70 | Positive | Positive | Negative       |
| TCGA-D8-A1JF | 0 | 366  | 79 | Negative | Negative | Negative       |



|              |   |      |    |          |          |                |
|--------------|---|------|----|----------|----------|----------------|
| TCGA-AN-A049 | 0 | 19   | 62 | Positive | Positive | Negative       |
| TCGA-A2-A1FW | 0 | 528  | 62 | Positive | Negative | Negative       |
| TCGA-AN-A0AL | 0 | 198  | 41 | Negative | Negative | Negative       |
| TCGA-AQ-A540 | 0 | 1001 | 51 | Positive | Positive | Negative       |
| TCGA-BH-A1ES | 1 | 3462 | 35 | Positive | Positive | Negative       |
| TCGA-AC-A6IW | 0 | 413  | 73 | Negative | Negative | Negative       |
| TCGA-AN-A0XS | 0 | 10   | 63 | Negative | Positive | Negative       |
| TCGA-C8-A12M | 0 | 358  | 70 | Positive | Negative | Negative       |
| TCGA-EW-A10Z | 0 | 1229 | 56 | Positive | Negative | Equivocal      |
| TCGA-A2-A0YF | 0 | 469  | 67 | Positive | Negative | Negative       |
| TCGA-A2-A0T2 | 1 | 255  | 66 | Negative | Negative | Negative       |
| TCGA-EW-A1P6 | 0 | 562  | 64 | Positive | Positive | Negative       |
| TCGA-3C-AALK | 0 | 1217 | 52 | Positive | Positive | Positive       |
| TCGA-AR-A254 | 0 | 2213 | 50 | Positive | Positive | Positive       |
| TCGA-AR-A256 | 1 | 2854 | 45 | Negative | Negative | Negative       |
| TCGA-C8-A12Q | 1 | 385  | 78 | Negative | Negative | Positive       |
| TCGA-B6-A40B | 0 | 3152 | 76 | Positive | Positive | Negative       |
| TCGA-B6-A0WZ | 0 | 3941 | 50 | Positive | Positive | NA             |
| TCGA-B6-A0RT | 0 | 2721 | 39 | Negative | Negative | NA             |
| TCGA-BH-A0DD | 0 | 1394 | 58 | Positive | Positive | Positive       |
| TCGA-A8-A097 | 0 | 365  | 65 | Positive | Positive | Positive       |
| TCGA-OK-A5Q2 | 0 | 64   | 59 | Positive | Positive | Negative       |
| TCGA-A7-A6VW | 0 | 285  | 48 | Negative | Negative | Negative       |
| TCGA-BH-A18H | 0 | 0    | 63 | Positive | Positive | Positive       |
| TCGA-D8-A1XW | 0 | 385  | 53 | Negative | Positive | Negative       |
| TCGA-BH-A0HA | 0 | 1611 | 31 | Positive | Positive | [NotAvailable] |
| TCGA-PL-A8LZ | 0 | 120  | 29 | NA       | NA       | NA             |
| TCGA-C8-A26V | 0 | 9    | 47 | Positive | Positive | Negative       |
| TCGA-AN-A0AT | 0 | 10   | 62 | Negative | Negative | Negative       |
| TCGA-HN-A20B | 0 | 1883 | 45 | Positive | Positive | Negative       |
| TCGA-E2-A150 | 0 | 773  | 48 | Negative | Negative | Negative       |
| TCGA-3C-AALJ | 0 | 1228 | 62 | Positive | Positive | NA             |
| TCGA-E2-A10E | 0 | 865  | 64 | Positive | Positive | Equivocal      |
| TCGA-E9-A22E | 0 | 392  | 56 | Positive | Positive | Positive       |
| TCGA-A7-A6VX | 0 | 317  | 68 | Positive | Positive | Negative       |
| TCGA-AN-A03X | 0 | 10   | 74 | Positive | Positive | Positive       |
| TCGA-AR-A24L | 1 | 2866 | 26 | Positive | Positive | Equivocal      |
| TCGA-A0-A0JA | 0 | 655  | 36 | Positive | Positive | Negative       |
| TCGA-D8-A1X0 | 0 | 473  | 56 | Positive | Positive | Negative       |
| TCGA-AC-A6IV | 0 | 568  | 47 | Positive | Positive | Equivocal      |
| TCGA-E9-A1RF | 0 | 200  | 68 | NA       | NA       | NA             |
| TCGA-A0-A0JJ | 0 | 1887 | 54 | Positive | Positive | Negative       |
| TCGA-A8-A084 | 0 | 458  | 81 | Positive | Negative | Negative       |
| TCGA-E9-A1N5 | 0 | 1120 | 45 | Positive | Positive | Positive       |

|              |   |      |    |          |          |           |
|--------------|---|------|----|----------|----------|-----------|
| TCGA-C8-A274 | 0 | 290  | 63 | Positive | Positive | Negative  |
| TCGA-A2-A0T1 | 0 | 521  | 55 | Negative | Negative | Positive  |
| TCGA-BH-A0DE | 0 | 948  | 62 | Positive | Positive | Negative  |
| TCGA-AN-A04A | 0 | 90   | 36 | Positive | Positive | Negative  |
| TCGA-BH-A6R8 | 0 | 293  | 46 | Positive | Positive | NA        |
| TCGA-BH-A0E1 | 0 | 477  | 52 | Positive | Positive | Equivocal |
| TCGA-A2-A0T6 | 0 | 575  | 50 | Positive | Positive | Negative  |
| TCGA-D8-A27L | 0 | 499  | 49 | Positive | Positive | Negative  |
| TCGA-B6-A0I5 | 0 | 4550 | 49 | Positive | Positive | NA        |
| TCGA-A0-A1K0 | 0 | 448  | 46 | Positive | Positive | Negative  |
| TCGA-BH-A0HU | 0 | 392  | 52 | Positive | Positive | Negative  |
| TCGA-A2-A25F | 0 | 322  | 66 | Negative | Positive | Negative  |
| TCGA-D8-A1XZ | 0 | 466  | 81 | Positive | Negative | Negative  |
| TCGA-D8-A4Z1 | 0 | 659  | 68 | Positive | Positive | Negative  |
| TCGA-A2-A0YK | 0 | 588  | 61 | Positive | Negative | Negative  |
| TCGA-BH-A0BM | 0 | 1876 | 54 | Positive | Negative | Negative  |
| TCGA-AR-A0TY | 1 | 1699 | 54 | Positive | Negative | Negative  |
| TCGA-D8-A1JA | 0 | 502  | 60 | Negative | Negative | Positive  |
| TCGA-BH-A0W7 | 0 | 1363 | 49 | Positive | Positive | Negative  |
| TCGA-AC-A30D | 0 | 451  | 68 | Positive | Positive | Negative  |
| TCGA-A0-A12D | 0 | 1948 | 43 | Negative | Negative | Positive  |
| TCGA-D8-A1J9 | 0 | 532  | 48 | Positive | Negative | Positive  |
| TCGA-A8-A07J | 0 | 365  | 35 | Positive | Positive | Negative  |
| TCGA-BH-A0HY | 0 | 1545 | 60 | Positive | Negative | Positive  |
| TCGA-3C-AALI | 0 | 3801 | 50 | Positive | Positive | Positive  |
| TCGA-AC-A2BM | 0 | 1162 | 41 | Positive | Positive | NA        |
| TCGA-A2-A1FX | 0 | 1119 | 61 | Positive | Positive | NA        |
| TCGA-A0-A0J4 | 0 | 1587 | 41 | Negative | Negative | Negative  |
| TCGA-EW-A2FV | 0 | 788  | 39 | Positive | Positive | Negative  |
| TCGA-A7-A3RF | 0 | 408  | 79 | Positive | Positive | Negative  |
| TCGA-E2-A15C | 0 | 694  | 61 | Positive | Positive | Equivocal |
| TCGA-LL-A7SZ | 0 | 170  | 49 | Positive | Positive | Negative  |
| TCGA-EW-A1PC | 0 | 187  | 66 | Positive | Positive | Negative  |
| TCGA-E9-A247 | 0 | 828  | 59 | NA       | NA       | NA        |
| TCGA-E2-A15G | 0 | 554  | 76 | Positive | Positive | Negative  |
| TCGA-AR-A0TU | 0 | 360  | 35 | Negative | Negative | Negative  |
| TCGA-AR-A1AW | 0 | 1935 | 65 | Positive | Positive | Equivocal |
| TCGA-A2-A0SW | 1 | 1365 | 82 | Positive | Negative | NA        |
| TCGA-S3-A6ZF | 0 | 502  | 64 | Positive | Positive | Equivocal |
| TCGA-B6-A2IU | 0 | 5176 | 62 | Positive | Positive | NA        |
| TCGA-A7-A26J | 0 | 627  | 49 | Positive | Positive | Negative  |
| TCGA-A7-A425 | 0 | 447  | 70 | Positive | Positive | NA        |
| TCGA-BH-A18T | 1 | 224  | 70 | Negative | Negative | Positive  |
| TCGA-GM-A3NW | 0 | 3361 | 63 | Negative | Positive | Equivocal |

|              |   |      |    |          |          |           |
|--------------|---|------|----|----------|----------|-----------|
| TCGA-A2-A0EV | 0 | 968  | 80 | Positive | Positive | Negative  |
| TCGA-AR-A24M | 0 | 2947 | 38 | Positive | Positive | Negative  |
| TCGA-E9-A1NF | 1 | 1072 | 60 | Positive | Positive | Negative  |
| TCGA-E2-A15M | 1 | 336  | 66 | Positive | Positive | Negative  |
| TCGA-A1-A0SM | 0 | 242  | 77 | Positive | Negative | Positive  |
| TCGA-A2-A3XZ | 0 | 973  | 46 | Negative | Negative | Positive  |
| TCGA-GM-A2DD | 0 | 1309 | 53 | Negative | Negative | Equivocal |
| TCGA-A8-A08S | 0 | 1004 | 71 | Positive | Positive | Positive  |
| TCGA-EW-A2FW | 0 | 672  | 52 | Positive | Positive | Negative  |
| TCGA-E9-A22H | 0 | 630  | 42 | Positive | Positive | Positive  |
| TCGA-BH-A0BZ | 0 | 1492 | 59 | Positive | Positive | Negative  |
| TCGA-A2-A3XX | 1 | 1439 | 49 | Negative | Negative | Negative  |
| TCGA-D8-A141 | 0 | 626  | 40 | Positive | Positive | Negative  |
| TCGA-BH-A0BQ | 0 | 827  | 39 | Positive | Positive | Positive  |
| TCGA-D8-A1JG | 0 | 366  | 62 | Negative | Negative | Equivocal |
| TCGA-AQ-A0Y5 | 1 | 172  | 70 | Positive | Positive | Positive  |
| TCGA-A8-A060 | 0 | 396  | 60 | Positive | Positive | Negative  |
| TCGA-A8-A09B | 0 | 365  | 58 | Positive | Positive | Negative  |
| TCGA-A2-A0ST | 0 | 3017 | 62 | Negative | Negative | NA        |
| TCGA-BH-A0B8 | 0 | 1569 | 64 | Positive | Positive | Equivocal |
| TCGA-AC-A3W5 | 0 | 504  | 65 | Positive | Positive | NA        |
| TCGA-WT-AB41 | 0 | 1550 | 55 | Positive | Positive | NA        |
| TCGA-AR-A0U1 | 0 | 3101 | 36 | Negative | Negative | Negative  |

### Validation

#### Set

|              |   |      |    |          |          |           |
|--------------|---|------|----|----------|----------|-----------|
| TCGA-A2-A0C0 | 1 | 3492 | 85 | Positive | Positive | Negative  |
| TCGA-AR-A0TW | 0 | 3009 | 50 | Positive | Positive | Equivocal |
| TCGA-A0-A1KP | 0 | 2513 | 77 | Positive | Positive | Negative  |
| TCGA-AC-A6IX | 0 | 373  | 49 | Positive | Positive | NA        |
| TCGA-A0-A0JF | 0 | 650  | 68 | Positive | Positive | Negative  |
| TCGA-AN-A0AS | 0 | 10   | 70 | Positive | Negative | Negative  |
| TCGA-E2-A1L8 | 0 | 1205 | 52 | Positive | Positive | Equivocal |
| TCGA-BH-A0E6 | 0 | 293  | 69 | Negative | Negative | Equivocal |
| TCGA-D8-A1XJ | 0 | 663  | 76 | Positive | Positive | Positive  |
| TCGA-A7-A26H | 0 | 724  | 72 | Positive | Negative | Equivocal |
| TCGA-B6-A0RM | 1 | 2373 | 57 | Positive | Positive | NA        |
| TCGA-BH-A42U | 0 | 3324 | 80 | Negative | Negative | Negative  |
| TCGA-BH-A0GZ | 0 | 328  | 62 | Positive | Positive | Equivocal |
| TCGA-E2-A15D | 0 | 526  | 47 | Positive | Positive | Equivocal |
| TCGA-A7-A5ZV | 0 | 368  | 62 | Negative | Negative | Equivocal |
| TCGA-EW-A1IW | 0 | 371  | 80 | Positive | Positive | Positive  |
| TCGA-OL-A5D8 | 0 | 973  | 40 | Positive | Positive | NA        |
| TCGA-LD-A74U | 0 | 203  | 79 | Positive | Negative | Negative  |
| TCGA-A7-A4SD | 0 | 441  | 52 | Negative | Negative | Equivocal |

|              |   |      |    |          |          |                |
|--------------|---|------|----|----------|----------|----------------|
| TCGA-AR-A1AK | 0 | 1559 | 70 | Positive | Positive | Negative       |
| TCGA-AC-A2FG | 0 | 1125 | 79 | Positive | Negative | NA             |
| TCGA-AR-A1AL | 0 | 1485 | 60 | Positive | Positive | Negative       |
| TCGA-E9-A1N4 | 0 | 1000 | 41 | Positive | Positive | Positive       |
| TCGA-AR-A1AN | 0 | 1330 | 46 | Positive | Positive | Negative       |
| TCGA-D8-A142 | 0 | 425  | 74 | Negative | Negative | Equivocal      |
| TCGA-AN-A0XN | 0 | 10   | 68 | Negative | Positive | Negative       |
| TCGA-E2-A1LK | 1 | 266  | 84 | Negative | Negative | Equivocal      |
| TCGA-EW-A1J1 | 0 | 575  | 38 | Positive | Positive | Negative       |
| TCGA-A8-A06Q | 0 | 31   | 63 | Positive | Positive | Negative       |
| TCGA-A8-A09N | 0 | 31   | 57 | Positive | Positive | Positive       |
| TCGA-BH-A1FM | 1 | 1388 | 44 | Positive | Negative | NA             |
| TCGA-AC-A2F0 | 0 | 1542 | 65 | Positive | Negative | Negative       |
| TCGA-EW-A1PD | 0 | 424  | 61 | Positive | Positive | Equivocal      |
| TCGA-OL-A5RY | 0 | 752  | 52 | Positive | Negative | NA             |
| TCGA-BH-A0DQ | 0 | 98   | 42 | Positive | Positive | Negative       |
| TCGA-AR-A24U | 0 | 1623 | 47 | Negative | Negative | Positive       |
| TCGA-D8-A1JC | 0 | 480  | 59 | Positive | Positive | Negative       |
| TCGA-A2-A04R | 0 | 2499 | 36 | Positive | Positive | Equivocal      |
| TCGA-C8-A135 | 0 | 32   | 64 | Negative | Negative | Positive       |
| TCGA-A2-A0ES | 0 | 1127 | 52 | Positive | Positive | Negative       |
| TCGA-A2-A04Y | 0 | 1099 | 53 | Positive | Positive | Negative       |
| TCGA-D8-A27N | 0 | 146  | 36 | Positive | Positive | Positive       |
| TCGA-A2-A4S0 | 0 | 706  | 77 | Positive | Positive | Negative       |
| TCGA-LL-A5YL | 0 | 519  | 64 | Positive | Negative | Positive       |
| TCGA-AN-A0FN | 0 | 218  | 61 | Positive | Positive | Positive       |
| TCGA-A7-A6VY | 0 | 266  | 48 | Negative | Negative | Negative       |
| TCGA-AN-A0AR | 0 | 10   | 55 | Negative | Negative | Negative       |
| TCGA-A8-A06T | 0 | 1614 | 75 | Positive | Positive | Positive       |
| TCGA-E2-A154 | 0 | 591  | 68 | Positive | Positive | Negative       |
| TCGA-A8-A08L | 1 | 304  | 89 | Positive | Negative | Negative       |
| TCGA-BH-A0HQ | 0 | 1121 | 56 | Positive | Positive | Negative       |
| TCGA-C8-A273 | 0 | 294  | 29 | Positive | Positive | Negative       |
| TCGA-B6-A1KN | 0 | 4233 | 57 | Negative | Negative | NA             |
| TCGA-AN-A0XV | 0 | 162  | 67 | Positive | Positive | Positive       |
| TCGA-BH-A0H3 | 0 | 1149 | 46 | Positive | Positive | [NotAvailable] |
| TCGA-AR-A240 | 0 | 2561 | 43 | Positive | Positive | Negative       |
| TCGA-B6-A0X0 | 1 | 3945 | 54 | Positive | Positive | NA             |
| TCGA-AQ-A54N | 0 | 78   | 51 | Negative | Negative | Equivocal      |
| TCGA-A8-A079 | 0 | 274  | 69 | Positive | Positive | Negative       |
| TCGA-E2-A107 | 0 | 1047 | 54 | Positive | Negative | Equivocal      |
| TCGA-BH-A18N | 1 | 1148 | 88 | Positive | Positive | Negative       |
| TCGA-E2-A14Q | 0 | 1163 | 50 | Positive | Positive | Negative       |
| TCGA-A2-A4S2 | 0 | 643  | 62 | Positive | Positive | Negative       |

|              |   |      |    |          |          |           |
|--------------|---|------|----|----------|----------|-----------|
| TCGA-S3-AA15 | 0 | 209  | 51 | Negative | Negative | Negative  |
| TCGA-D8-A27M | 0 | 410  | 59 | Negative | Negative | Negative  |
| TCGA-BH-A0EI | 0 | 743  | 51 | Positive | Positive | Negative  |
| TCGA-E2-A9RU | 0 | 280  | 90 | Positive | Negative | Equivocal |
| TCGA-BH-A0AU | 0 | 746  | 45 | Positive | Positive | Positive  |
| TCGA-BH-A0BL | 0 | 1340 | 35 | Negative | Negative | Negative  |
| TCGA-E9-A1N3 | 0 | 0    | 70 | NA       | NA       | NA        |
| TCGA-D8-A1X5 | 0 | 565  | 81 | Positive | Positive | Positive  |
| TCGA-E2-A1B6 | 0 | 867  | 44 | Negative | Negative | Equivocal |
| TCGA-A8-A07B | 0 | 1308 | 69 | Positive | Positive | Positive  |
| TCGA-A2-A0YH | 0 | 659  | 53 | Positive | Positive | Negative  |
| TCGA-A2-A0T7 | 0 | 631  | 51 | Positive | Positive | Negative  |
| TCGA-A8-A08A | 0 | 30   | 89 | Positive | Positive | Negative  |
| TCGA-A2-A0EN | 0 | 2718 | 70 | Positive | Positive | Equivocal |
| TCGA-A8-A09R | 0 | 273  | 82 | Positive | Positive | Negative  |
| TCGA-C8-A278 | 0 | 289  | 61 | Negative | Negative | Positive  |
| TCGA-OL-A6VR | 0 | 1220 | 48 | Positive | Positive | Negative  |
| TCGA-AN-A0FF | 0 | 141  | 32 | Positive | Positive | Negative  |
| TCGA-A1-A0SP | 0 | 584  | 40 | Negative | Negative | Negative  |
| TCGA-E2-A14W | 0 | 974  | 78 | Positive | Positive | NA        |
| TCGA-B6-A0IE | 1 | 1999 | 38 | Negative | Negative | NA        |
| TCGA-E2-A1LA | 0 | 748  | 59 | Positive | Positive | Equivocal |
| TCGA-D8-A1JM | 0 | 590  | 59 | Positive | Negative | Negative  |
| TCGA-A0-A129 | 0 | 2923 | 29 | Negative | Negative | Negative  |
| TCGA-BH-A0AY | 0 | 777  | 62 | Positive | Positive | Negative  |
| TCGA-E2-A1IO | 0 | 638  | 37 | Positive | Positive | Equivocal |
| TCGA-A1-A0SO | 0 | 852  | 67 | Negative | Negative | Equivocal |
| TCGA-D8-A1XA | 0 | 839  | 64 | Positive | Positive | Equivocal |
| TCGA-BH-A1EW | 1 | 1694 | 38 | Negative | Negative | Negative  |
| TCGA-4H-AAAK | 0 | 348  | 50 | Positive | Positive | Equivocal |
| TCGA-E9-A1RA | 0 | 976  | 48 | NA       | NA       | NA        |
| TCGA-JL-A3YX | 0 | 352  | 46 | Positive | Positive | Positive  |
| TCGA-D8-A27H | 0 | 397  | 72 | Negative | Negative | Negative  |
| TCGA-E9-A5FK | 0 | 447  | 60 | Positive | Positive | Negative  |
| TCGA-HN-A2NL | 0 | 79   | 56 | Negative | Negative | Negative  |
| TCGA-LL-A6FR | 0 | 489  | 50 | Negative | Positive | Equivocal |
| TCGA-A2-A25B | 0 | 496  | 39 | Positive | Positive | Equivocal |
| TCGA-EW-A1J3 | 0 | 504  | 61 | Positive | Positive | Positive  |
| TCGA-A8-A09D | 0 | 1522 | 47 | Positive | Positive | Negative  |
| TCGA-E2-A15P | 0 | 595  | 61 | Positive | Positive | Negative  |
| TCGA-BH-A18G | 0 | 61   | 81 | Negative | Negative | Negative  |
| TCGA-EW-A1PG | 0 | 1051 | 53 | Positive | Positive | Equivocal |
| TCGA-B6-A0RV | 0 | 4788 | 42 | Positive | Positive | NA        |
| TCGA-C8-A132 | 0 | 57   | 56 | Positive | Positive | NA        |

|              |   |      |    |          |          |           |
|--------------|---|------|----|----------|----------|-----------|
| TCGA-GM-A5PV | 0 | 412  | 63 | Positive | Positive | NA        |
| TCGA-B6-A0WT | 0 | 5739 | 61 | Positive | Positive | NA        |
| TCGA-E9-A6HE | 0 | 468  | 45 | Positive | Positive | Negative  |
| TCGA-BH-A0EB | 0 | 745  | 69 | Positive | Positive | Equivocal |
| TCGA-A2-A259 | 0 | 1596 | 70 | Positive | Positive | Negative  |
| TCGA-AR-A0TR | 1 | 160  | 68 | Positive | Positive | Equivocal |
| TCGA-A2-A0CP | 0 | 2813 | 60 | Positive | Positive | NA        |
| TCGA-A8-A08T | 1 | 3409 | 64 | Positive | Positive | Positive  |
| TCGA-AN-A0FV | 0 | 10   | 58 | Negative | Negative | Positive  |
| TCGA-D8-A1XY | 0 | 503  | 74 | Positive | Positive | Positive  |
| TCGA-C8-A131 | 0 | 68   | 82 | Negative | Negative | Negative  |
| TCGA-B6-A0I9 | 1 | 369  | 62 | NA       | Positive | NA        |
| TCGA-E2-A1BC | 0 | 501  | 63 | Positive | Positive | Negative  |
| TCGA-A2-A25A | 0 | 3276 | 44 | Positive | Positive | Equivocal |
| TCGA-AR-A0U2 | 1 | 2551 | 47 | Positive | Positive | Negative  |
| TCGA-BH-A0HN | 0 | 516  | 67 | Positive | Positive | Equivocal |
| TCGA-OL-A660 | 0 | 528  | 39 | Positive | Positive | NA        |
| TCGA-C8-A12T | 0 | 0    | 43 | Positive | Positive | Positive  |
| TCGA-E9-A1R2 | 0 | 19   | 51 | Positive | Negative | Equivocal |
| TCGA-E2-A1BD | 0 | 520  | 53 | Positive | Positive | Equivocal |
| TCGA-A7-A26E | 0 | 954  | 71 | Positive | Positive | Negative  |
| TCGA-BH-A42V | 0 | 272  | 41 | Positive | Positive | Negative  |
| TCGA-AC-A62V | 1 | 348  | 58 | Positive | Positive | NA        |
| TCGA-A8-A07P | 0 | 334  | 68 | Positive | Positive | Positive  |
| TCGA-D8-A1JH | 0 | 426  | 56 | Positive | Positive | Negative  |
| TCGA-A8-A08C | 0 | 881  | 65 | Positive | Positive | Positive  |
| TCGA-B6-A0IB | 1 | 3941 | 64 | Positive | Positive | NA        |
| TCGA-E2-A15A | 0 | 710  | 45 | Positive | Positive | Negative  |
| TCGA-AR-A0TS | 0 | 2275 | 46 | Negative | Negative | Negative  |
| TCGA-LL-A441 | 0 | 348  | 62 | Negative | Negative | Negative  |
| TCGA-A7-A56D | 0 | 448  | 84 | Positive | Positive | Negative  |
| TCGA-BH-A0B5 | 0 | 1471 | 40 | Positive | Positive | Negative  |
| TCGA-BH-A0BJ | 0 | 660  | 41 | Positive | Positive | Negative  |
| TCGA-BH-A0WA | 0 | 701  | 82 | Negative | Negative | Negative  |
| TCGA-D8-A1XD | 0 | 522  | 36 | Positive | Positive | Negative  |
| TCGA-BH-A1EN | 1 | 2053 | 78 | Negative | Negative | Positive  |
| TCGA-S3-AA10 | 0 | 468  | 65 | Negative | Negative | Negative  |
| TCGA-A0-A0JD | 0 | 2190 | 59 | Positive | Positive | Negative  |
| TCGA-LL-A5YN | 0 | 447  | 46 | Positive | Positive | Equivocal |
| TCGA-C8-A27A | 0 | 371  | 48 | Positive | Positive | Negative  |
| TCGA-A7-A13D | 0 | 965  | 46 | Negative | Positive | Equivocal |
| TCGA-BH-A0BG | 0 | 756  | 73 | Negative | Negative | Negative  |
| TCGA-EW-A1J5 | 0 | 477  | 59 | Positive | Positive | Negative  |
| TCGA-B6-A0WY | 1 | 3461 | 40 | Positive | Negative | NA        |

|              |   |      |    |          |          |           |
|--------------|---|------|----|----------|----------|-----------|
| TCGA-AR-A2LQ | 0 | 1233 | 59 | Positive | Positive | Negative  |
| TCGA-A2-A0YI | 0 | 441  | 62 | Positive | Positive | Negative  |
| TCGA-A2-A0EY | 0 | 735  | 62 | Positive | Negative | Positive  |
| TCGA-AR-A1AS | 0 | 1150 | 54 | Positive | Positive | Negative  |
| TCGA-E2-A15R | 0 | 519  | 64 | Positive | Positive | Equivocal |
| TCGA-OL-A5RX | 0 | 513  | 51 | Positive | Positive | NA        |
| TCGA-BH-A0H9 | 0 | 1247 | 69 | Positive | Positive | Equivocal |
| TCGA-E9-A3H0 | 0 | 793  | 49 | NA       | NA       | NA        |
| TCGA-A7-A26G | 0 | 722  | 50 | Negative | Negative | Negative  |
| TCGA-A1-A0SN | 0 | 1196 | 50 | Positive | Positive | Positive  |
| TCGA-EW-A10X | 0 | 911  | 43 | Positive | Positive | Negative  |
| TCGA-E2-A1AZ | 0 | 2329 | 63 | Negative | Negative | NA        |
| TCGA-A2-A3XT | 0 | 2525 | 45 | Negative | Negative | Negative  |
| TCGA-A8-A07W | 0 | 304  | 76 | Positive | Positive | Negative  |
| TCGA-A7-A0DC | 0 | 906  | 63 | Positive | Negative | Negative  |
| TCGA-E2-A153 | 0 | 707  | 51 | Positive | Positive | Negative  |
| TCGA-E2-A2P5 | 0 | 515  | 78 | Positive | Positive | NA        |
| TCGA-BH-A18L | 1 | 811  | 50 | Positive | Positive | Negative  |
| TCGA-BH-A1F0 | 1 | 785  | 80 | Negative | NA       | Negative  |
| TCGA-GM-A2DH | 0 | 1286 | 58 | Negative | Negative | Negative  |
| TCGA-A8-A09A | 0 | 304  | 40 | Positive | Positive | Negative  |
| TCGA-BH-A0E0 | 0 | 134  | 38 | Negative | Negative | Negative  |
| TCGA-PE-A5DD | 0 | 1953 | 64 | Positive | Negative | Positive  |
| TCGA-E2-A1II | 0 | 1025 | 51 | Negative | Positive | Negative  |
| TCGA-AC-A2FK | 0 | 1180 | 45 | Positive | Positive | NA        |
| TCGA-A8-A08F | 0 | 1004 | 59 | Positive | Positive | Negative  |
| TCGA-D8-A27I | 0 | 439  | 58 | Positive | Positive | Negative  |
| TCGA-AN-A0FZ | 0 | 10   | 45 | Positive | Negative | Positive  |
| TCGA-BH-A0DZ | 0 | 495  | 43 | Positive | Positive | Positive  |
| TCGA-D8-A1XU | 0 | 395  | 56 | Positive | Positive | Negative  |
| TCGA-D8-A27E | 0 | 530  | 66 | Positive | Positive | Negative  |
| TCGA-E2-A14U | 0 | 1318 | 74 | Positive | Positive | Equivocal |
| TCGA-A8-A083 | 0 | 0    | 67 | Positive | Positive | Negative  |
| TCGA-AN-A0FW | 0 | 11   | 67 | Positive | NA       | Negative  |
| TCGA-E9-A1R6 | 0 | 84   | 63 | NA       | NA       | NA        |
| TCGA-AR-A0TZ | 1 | 3262 | 43 | Positive | Positive | Equivocal |
| TCGA-XX-A899 | 0 | 292  | 46 | Positive | Positive | Negative  |
| TCGA-E9-A228 | 0 | 381  | 58 | NA       | NA       | NA        |
| TCGA-E2-A15K | 0 | 275  | 58 | Positive | Positive | Equivocal |
| TCGA-C8-A1HL | 0 | 317  | 38 | Positive | Negative | Equivocal |
| TCGA-E2-A158 | 0 | 450  | 43 | Negative | Negative | Negative  |
| TCGA-AN-A04D | 0 | 52   | 58 | Negative | Negative | Negative  |
| TCGA-D8-A1JE | 0 | 575  | 62 | Positive | Positive | Negative  |
| TCGA-E2-A1IF | 0 | 1138 | 74 | Positive | Positive | Negative  |

|              |   |      |    |          |          |                |
|--------------|---|------|----|----------|----------|----------------|
| TCGA-AC-A2QH | 0 | 31   | 58 | Negative | Negative | Negative       |
| TCGA-A7-A426 | 0 | 364  | 50 | Positive | Positive | Negative       |
| TCGA-JL-A3YW | 0 | 360  | 49 | Positive | Positive | Positive       |
| TCGA-E2-A573 | 0 | 1062 | 48 | Negative | Negative | Equivocal      |
| TCGA-A2-A0EQ | 0 | 2426 | 64 | Negative | Negative | Positive       |
| TCGA-BH-A0HP | 0 | 414  | 65 | Positive | Negative | Negative       |
| TCGA-AC-A3YJ | 0 | 754  | 66 | Positive | Positive | [NotAvailable] |
| TCGA-B6-A0IQ | 0 | 4285 | 40 | Negative | Negative | NA             |
| TCGA-EW-A1PB | 0 | 608  | 70 | Negative | Negative | Negative       |
| TCGA-A2-A3XY | 0 | 1064 | 49 | Negative | Negative | Negative       |
| TCGA-E2-A56Z | 0 | 219  | 69 | Positive | Positive | Equivocal      |
| TCGA-BH-A1EU | 1 | 1286 | 83 | Positive | Positive | Negative       |
| TCGA-EW-A3E8 | 0 | 1035 | 60 | Positive | Negative | Negative       |
| TCGA-EW-A1PF | 0 | 439  | 50 | Positive | Positive | Negative       |
| TCGA-B6-A0IM | 0 | 3836 | 75 | Positive | Positive | NA             |
| TCGA-E2-A14X | 0 | 972  | 55 | Negative | Negative | Negative       |
| TCGA-D8-A1XS | 0 | 496  | 48 | Positive | Positive | Positive       |
| TCGA-AR-A0TT | 0 | 2636 | 53 | Positive | Negative | Negative       |
| TCGA-A8-A07L | 0 | 518  | 58 | Positive | Positive | Negative       |
| TCGA-A2-A0ET | 0 | 1066 | 58 | Positive | Positive | Equivocal      |
| TCGA-BH-A0HX | 0 | 829  | 54 | Positive | Positive | Negative       |
| TCGA-BH-A0AV | 0 | 1180 | 52 | Negative | Negative | [NotAvailable] |
| TCGA-D8-A1XK | 0 | 441  | 55 | Negative | Negative | Negative       |
| TCGA-D8-A73W | 0 | 244  | 79 | Positive | Negative | Negative       |
| TCGA-AC-A2QJ | 0 | 69   | 48 | Negative | Negative | Negative       |
| TCGA-A1-A0SI | 0 | 635  | 52 | Positive | Positive | Negative       |
| TCGA-A2-A0YJ | 0 | 566  | 39 | Positive | Negative | Negative       |
| TCGA-D8-A1XB | 0 | 552  | 62 | Positive | Positive | Negative       |
| TCGA-C8-A12V | 0 | 385  | 55 | Negative | Negative | Negative       |
| TCGA-C8-A12W | 0 | 385  | 49 | Positive | Positive | Negative       |
| TCGA-D8-A1Y1 | 1 | 302  | 80 | Positive | Positive | Negative       |
| TCGA-A2-A4RW | 0 | 222  | 49 | Positive | Positive | Negative       |
| TCGA-A2-A0T3 | 0 | 569  | 37 | Positive | Positive | Equivocal      |
| TCGA-D8-A1X6 | 0 | 541  | 80 | Positive | Positive | Negative       |
| TCGA-OL-A66K | 1 | 1275 | 72 | Positive | Positive | Equivocal      |
| TCGA-B6-A0IN | 1 | 2573 | 45 | Positive | Negative | NA             |
| TCGA-BH-A0DG | 0 | 713  | 30 | Positive | Negative | Negative       |
| TCGA-D8-A1XQ | 0 | 499  | 69 | Negative | Negative | Negative       |
| TCGA-GM-A5PX | 0 | 551  | 65 | Positive | Positive | Negative       |
| TCGA-A2-A0YG | 0 | 666  | 63 | Positive | Positive | Positive       |
| TCGA-A2-A0D2 | 0 | 1027 | 45 | Negative | Negative | Negative       |
| TCGA-E2-A14R | 0 | 1174 | 62 | Negative | Negative | Negative       |
| TCGA-A2-A0CW | 0 | 1948 | 67 | Positive | Positive | Equivocal      |
| TCGA-AQ-A04J | 0 | 819  | 45 | Negative | Negative | Negative       |



|              |   |      |    |          |          |           |
|--------------|---|------|----|----------|----------|-----------|
| TCGA-A8-A080 | 0 | 943  | 45 | Positive | Positive | Negative  |
| TCGA-E2-A1B0 | 0 | 1631 | 50 | Negative | Negative | Positive  |
| TCGA-E2-A1LE | 1 | 879  | 71 | Negative | Negative | Positive  |
| TCGA-OL-A5RW | 0 | 1106 | 40 | Negative | Negative | NA        |
| TCGA-B6-A401 | 0 | 2596 | 47 | Positive | Positive | Negative  |
| TCGA-E2-A15J | 0 | 590  | 51 | Positive | Positive | Equivocal |
| TCGA-E2-A15E | 0 | 630  | 40 | Positive | Positive | NA        |
| TCGA-BH-A1FR | 1 | 4398 | 73 | Positive | Positive | NA        |
| TCGA-AC-A2FF | 0 | 1686 | 40 | Positive | Positive | NA        |
| TCGA-AC-A80R | 0 | 40   | 75 | Positive | Positive | Negative  |
| TCGA-B6-A1KF | 0 | 3088 | 68 | Negative | Negative | Equivocal |
| TCGA-BH-A18J | 1 | 612  | 56 | Positive | Positive | Negative  |
| TCGA-A2-A0D1 | 0 | 1051 | 76 | Negative | Negative | Positive  |
| TCGA-D8-A27T | 0 | 398  | 53 | Positive | Positive | Negative  |
| TCGA-BH-A18Q | 1 | 1692 | 56 | Negative | Negative | Positive  |
| TCGA-LL-A7T0 | 0 | 376  | 70 | Positive | Positive | Positive  |
| TCGA-A8-A06Z | 0 | 31   | 84 | Positive | Positive | Negative  |
| TCGA-EW-A1J2 | 0 | 403  | 50 | Positive | Positive | Negative  |
| TCGA-E2-A106 | 0 | 1807 | 34 | Positive | Positive | Equivocal |
| TCGA-AR-A1AJ | 0 | 1605 | 83 | Positive | Negative | Negative  |
| TCGA-A1-A0SJ | 0 | 416  | 39 | Positive | Positive | Equivocal |
| TCGA-LL-A740 | 0 | 441  | 61 | Negative | Negative | Equivocal |
| TCGA-D8-A1JB | 0 | 569  | 54 | Positive | Positive | Equivocal |
| TCGA-5T-A9QA | 0 | 12   | 52 | Positive | Negative | Equivocal |
| TCGA-LL-A6FP | 0 | 677  | 90 | Positive | Positive | Equivocal |
| TCGA-E9-A1RE | 0 | 1054 | 74 | NA       | NA       | NA        |
| TCGA-A8-A08P | 0 | 943  | 70 | Positive | Positive | Positive  |
| TCGA-LL-A442 | 0 | 333  | 56 | Positive | Positive | Equivocal |
| TCGA-AR-A24N | 0 | 2388 | 54 | Positive | Positive | Equivocal |
| TCGA-A2-A3Y0 | 0 | 1167 | 57 | Positive | Negative | Negative  |
| TCGA-A2-A3XV | 0 | 996  | 46 | Positive | Negative | Equivocal |
| TCGA-E2-A1B5 | 0 | 984  | 46 | Positive | Positive | Negative  |
| TCGA-LL-A9Q3 | 0 | 224  | 69 | Positive | Positive | Positive  |
| TCGA-A8-A07R | 0 | 273  | 80 | Negative | Negative | Positive  |
| TCGA-BH-A0HI | 0 | 620  | 78 | Positive | Positive | Negative  |
| TCGA-A0-A12B | 0 | 2359 | 63 | Positive | Positive | Negative  |
| TCGA-A2-A04X | 0 | 1686 | 34 | Positive | Positive | Positive  |
| TCGA-C8-A12Y | 0 | 0    | 44 | NA       | NA       | NA        |
| TCGA-E9-A1RI | 0 | 1084 | 43 | NA       | NA       | NA        |
| TCGA-C8-A12U | 0 | 385  | 46 | Positive | Positive | Negative  |
| TCGA-BH-A0B1 | 0 | 1148 | 66 | Positive | Positive | Negative  |
| TCGA-E9-A22G | 0 | 715  | 47 | Negative | Negative | Positive  |
| TCGA-E2-A152 | 0 | 825  | 56 | Positive | Negative | Positive  |
| TCGA-PL-A8LV | 0 | 7    | 54 | NA       | NA       | NA        |

|              |   |      |    |          |          |           |
|--------------|---|------|----|----------|----------|-----------|
| TCGA-A2-A0CK | 0 | 4159 | 60 | Positive | Positive | Negative  |
| TCGA-BH-A1FU | 1 | 2192 | 44 | Negative | Negative | NA        |
| TCGA-E2-A15H | 0 | 393  | 38 | Positive | Positive | Equivocal |
| TCGA-A8-A099 | 0 | 304  | 76 | Positive | Positive | Positive  |
| TCGA-OL-A5D7 | 0 | 1416 | 70 | Negative | Negative | NA        |
| TCGA-AR-A1A0 | 0 | 1325 | 47 | Positive | Negative | Negative  |
| TCGA-AN-A0FK | 0 | 213  | 88 | Positive | Positive | Positive  |
| TCGA-A0-A12H | 0 | 863  | 69 | Positive | Positive | Negative  |
| TCGA-A2-A0D3 | 0 | 875  | 42 | Positive | Positive | Negative  |
| TCGA-E9-A3Q9 | 0 | 560  | 78 | Positive | Positive | NA        |
| TCGA-A2-A0YT | 1 | 723  | 56 | Positive | Negative | NA        |
| TCGA-OL-A66H | 0 | 812  | 74 | Positive | Positive | NA        |
| TCGA-BH-A0C3 | 0 | 1464 | 47 | Positive | Negative | Negative  |
| TCGA-E9-A5U0 | 0 | 420  | 41 | NA       | NA       | NA        |
| TCGA-A8-A09Q | 0 | 761  | 83 | Positive | Positive | Negative  |
| TCGA-E9-A227 | 0 | 24   | 42 | Positive | Positive | Negative  |
| TCGA-A1-A0SQ | 0 | 554  | 45 | Positive | Positive | Negative  |
| TCGA-E9-A229 | 0 | 405  | 37 | NA       | NA       | NA        |
| TCGA-A8-A075 | 0 | 518  | 42 | Positive | Positive | Positive  |
| TCGA-A7-A4SA | 0 | 454  | 40 | Positive | Negative | Negative  |
| TCGA-A0-A03N | 0 | 2031 | 59 | Positive | Positive | Negative  |
| TCGA-A2-A0CZ | 0 | 1616 | 46 | Positive | Positive | Negative  |
| TCGA-BH-A0C7 | 0 | 1305 | 48 | Positive | Negative | NA        |
| TCGA-BH-A0DS | 0 | 78   | 71 | Positive | Positive | Negative  |
| TCGA-AN-A0FX | 0 | 10   | 52 | Negative | Negative | Positive  |
| TCGA-E9-A1RC | 0 | 1224 | 56 | NA       | NA       | NA        |
| TCGA-AR-A1AP | 0 | 1216 | 80 | Positive | Positive | Equivocal |
| TCGA-D8-A1Y0 | 0 | 472  | 65 | Positive | Positive | Negative  |
| TCGA-BH-A0GY | 0 | 923  | 67 | Positive | Positive | Negative  |
| TCGA-A8-A092 | 0 | 942  | 48 | Positive | Positive | Negative  |
| TCGA-E2-A3DX | 0 | 478  | 43 | Positive | Positive | NA        |
| TCGA-B6-A0I1 | 1 | 2361 | 73 | Negative | Negative | NA        |
| TCGA-B6-A0IH | 1 | 3418 | 81 | Positive | Positive | NA        |
| TCGA-E2-A15S | 0 | 428  | 34 | Positive | Negative | Equivocal |
| TCGA-E2-A10A | 0 | 1229 | 41 | Positive | Positive | Positive  |
| TCGA-AC-A2B8 | 0 | 45   | 84 | Positive | Positive | Negative  |
| TCGA-GM-A3NY | 0 | 1162 | 72 | Positive | Positive | Negative  |
| TCGA-A2-A0CX | 0 | 1728 | 52 | Positive | Negative | Positive  |
| TCGA-A0-A03M | 0 | 1866 | 29 | Positive | Positive | Negative  |
| TCGA-A0-A12E | 0 | 1743 | 51 | Positive | Positive | Negative  |
| TCGA-AR-A252 | 0 | 2226 | 50 | Positive | Positive | Negative  |
| TCGA-AR-A24Z | 0 | 2403 | 57 | Positive | Positive | Negative  |
| TCGA-D8-A1XF | 0 | 463  | 45 | Positive | Positive | Negative  |
| TCGA-A7-A0DB | 0 | 1007 | 56 | Positive | Positive | Negative  |

|              |   |      |    |          |          |           |
|--------------|---|------|----|----------|----------|-----------|
| TCGA-B6-A0X5 | 1 | 2097 | 61 | Positive | Positive | NA        |
| TCGA-BH-A8G0 | 0 | 662  | 54 | Positive | Positive | Negative  |
| TCGA-A2-A3KD | 0 | 1206 | 47 | Positive | Positive | Negative  |
| TCGA-PL-A8LY | 0 | 8    | 30 | NA       | NA       | NA        |
| TCGA-BH-A28Q | 0 | 196  | 46 | Positive | Positive | Negative  |
| TCGA-AN-A0FD | 0 | 196  | 71 | Positive | Positive | Positive  |
| TCGA-A2-A25D | 0 | 552  | 90 | Positive | Negative | Negative  |
| TCGA-A7-A13F | 0 | 765  | 44 | Positive | Positive | Equivocal |
| TCGA-E2-A108 | 0 | 837  | 64 | Positive | Positive | Negative  |
| TCGA-E2-A14V | 0 | 1042 | 53 | Positive | Positive | Positive  |
| TCGA-BH-A18R | 1 | 1142 | 50 | NA       | Negative | Positive  |
| TCGA-AR-A1AH | 0 | 2298 | 51 | Positive | Negative | Negative  |
| TCGA-AR-A24T | 0 | 2312 | 46 | Positive | Positive | Equivocal |
| TCGA-AC-A5XS | 0 | 47   | 74 | Positive | Positive | Negative  |
| TCGA-C8-A26W | 0 | 7    | 58 | Positive | Positive | Equivocal |
| TCGA-BH-A18U | 1 | 1563 | 72 | Positive | Positive | Positive  |
| TCGA-B6-A0IG | 1 | 4456 | 50 | Positive | Positive | NA        |
| TCGA-AN-A0FT | 0 | 183  | 63 | Positive | Positive | Positive  |
| TCGA-E2-A150 | 0 | 396  | 89 | Positive | Positive | Equivocal |
| TCGA-B6-A0IO | 0 | 3350 | 66 | Positive | NA       | NA        |
| TCGA-E2-A574 | 0 | 605  | 44 | Negative | Negative | Equivocal |
| TCGA-A1-A0SK | 1 | 967  | 54 | Negative | Negative | Negative  |
| TCGA-E2-A14Z | 1 | 563  | 64 | Positive | Positive | Negative  |
| TCGA-A8-A06P | 0 | 396  | 63 | Positive | Positive | Negative  |
| TCGA-E2-A1IE | 0 | 1165 | 61 | Positive | Positive | Equivocal |
| TCGA-D8-A73U | 0 | 492  | 88 | Positive | Positive | Negative  |
| TCGA-A0-A0J5 | 1 | 792  | 48 | Positive | Negative | Equivocal |
| TCGA-E2-A14Y | 0 | 870  | 35 | Positive | Positive | Equivocal |
| TCGA-E2-A1L9 | 0 | 598  | 40 | Positive | Positive | Negative  |
| TCGA-E9-A1N8 | 0 | 365  | 48 | Negative | NA       | Negative  |
| TCGA-BH-A0C1 | 0 | 1339 | 61 | Positive | Positive | Negative  |
| TCGA-A2-A0CV | 0 | 1930 | 41 | Positive | Positive | Negative  |
| TCGA-AR-A1AV | 0 | 1864 | 68 | Positive | Positive | Negative  |
| TCGA-BH-A1FC | 1 | 3472 | 78 | Negative | Negative | Negative  |
| TCGA-A0-A12F | 0 | 1471 | 36 | Negative | Negative | Negative  |
| TCGA-D8-A1JT | 0 | 405  | 70 | Positive | Positive | Equivocal |
| TCGA-B6-A0IA | 0 | 6719 | 51 | Positive | Positive | NA        |
| TCGA-AC-A2BK | 0 | 1172 | 78 | Negative | Negative | Negative  |
| TCGA-BH-A0HK | 0 | 178  | 81 | Positive | Negative | Negative  |
| TCGA-S3-AA12 | 0 | 259  | 82 | Positive | Negative | Negative  |
| TCGA-AN-A0XR | 0 | 10   | 55 | Positive | Negative | Negative  |
| TCGA-A2-A04T | 0 | 2246 | 62 | Negative | Negative | Equivocal |
| TCGA-AR-A2LN | 0 | 1161 | 65 | Positive | Positive | Negative  |
| TCGA-A7-A6VV | 0 | 313  | 51 | Negative | Negative | Negative  |

|              |   |      |    |          |          |           |
|--------------|---|------|----|----------|----------|-----------|
| TCGA-A8-A08J | 1 | 1127 | 52 | Positive | Negative | Negative  |
| TCGA-A7-A4SB | 0 | 418  | 56 | Positive | Positive | Negative  |
| TCGA-EW-A3U0 | 0 | 532  | 61 | Negative | Negative | Negative  |
| TCGA-C8-A1HG | 0 | 345  | 50 | Positive | Positive | Negative  |
| TCGA-BH-A1FG | 1 | 3738 | 88 | Positive | Positive | Negative  |
| TCGA-AR-A255 | 0 | 1792 | 62 | Positive | Positive | Positive  |
| TCGA-A8-A07C | 0 | 1034 | 57 | Negative | Negative | Negative  |
| TCGA-A1-A0SE | 0 | 1321 | 56 | Positive | Positive | Negative  |
| TCGA-BH-A0HB | 0 | 806  | 55 | Positive | Positive | Equivocal |
| TCGA-A8-A0AB | 0 | 518  | 54 | Positive | Positive | Positive  |
| TCGA-A8-A07F | 0 | 577  | 65 | Positive | Positive | Negative  |
| TCGA-BH-A209 | 1 | 3959 | 77 | Positive | Positive | NA        |
| TCGA-A2-A4RY | 0 | 648  | 46 | Positive | Positive | Negative  |
| TCGA-AC-A3TN | 0 | 34   | 75 | Positive | Positive | Positive  |
| TCGA-BH-A1FJ | 1 | 1927 | 66 | Negative | Positive | NA        |
| TCGA-B6-A0RU | 0 | 3991 | 49 | Negative | Negative | NA        |
| TCGA-AC-A3HN | 0 | 21   | 87 | Positive | Positive | Negative  |
| TCGA-BH-A0DV | 0 | 1374 | 54 | Positive | Positive | Negative  |
| TCGA-A0-A0J3 | 0 | 651  | 67 | Positive | Positive | Equivocal |
| TCGA-E2-A109 | 0 | 1417 | 64 | Positive | Negative | Equivocal |
| TCGA-A7-A3IY | 0 | 345  | 71 | Positive | Positive | Negative  |
| TCGA-A8-A08I | 0 | 365  | 53 | Positive | Positive | Negative  |
| TCGA-A0-A03R | 0 | 2091 | 57 | Positive | Positive | Negative  |
| TCGA-E9-A24A | 0 | 747  | 69 | NA       | NA       | NA        |
| TCGA-B6-A1KI | 0 | 2236 | 63 | Positive | Positive | Equivocal |
| TCGA-E9-A1NC | 0 | 1203 | 61 | Negative | Positive | Positive  |
| TCGA-A0-A03P | 1 | 2911 | 54 | Positive | Positive | Negative  |
| TCGA-Z7-A8R5 | 0 | 3287 | 61 | Positive | Positive | Negative  |
| TCGA-EW-A1P4 | 0 | 907  | 43 | Negative | Negative | Negative  |
| TCGA-A0-A0J9 | 0 | 1613 | 61 | Positive | Positive | NA        |
| TCGA-D8-A1JP | 0 | 639  | 73 | Positive | Positive | Negative  |
| TCGA-C8-A120 | 0 | 385  | 50 | Positive | Positive | Negative  |
| TCGA-AR-A24X | 0 | 2548 | 52 | Positive | Positive | Equivocal |
| TCGA-GM-A2DC | 0 | 1628 | 57 | Positive | Positive | NA        |
| TCGA-AR-A1AI | 0 | 1881 | 47 | Negative | Negative | Equivocal |
| TCGA-AQ-A1H3 | 0 | 989  | 49 | Positive | Positive | Negative  |
| TCGA-C8-A12P | 0 | 358  | 55 | Negative | Negative | Positive  |
| TCGA-AR-A1AT | 1 | 1272 | 62 | Positive | Positive | Positive  |
| TCGA-D8-A1XC | 1 | 377  | 85 | Positive | Positive | Negative  |
| TCGA-E2-A15I | 0 | 530  | 44 | Positive | Positive | Equivocal |
| TCGA-B6-A0RS | 1 | 3063 | 38 | Negative | Negative | NA        |
| TCGA-BH-A0DX | 0 | 1442 | 62 | Positive | Positive | Negative  |
| TCGA-E2-A1B1 | 0 | 1613 | 45 | Positive | Positive | Equivocal |
| TCGA-D8-A1JJ | 0 | 611  | 54 | Positive | Positive | Negative  |

|              |   |      |    |          |          |           |
|--------------|---|------|----|----------|----------|-----------|
| TCGA-AR-A2LM | 0 | 1218 | 49 | Positive | Positive | NA        |
| TCGA-GM-A3XL | 0 | 2108 | 49 | Negative | Negative | NA        |
| TCGA-BH-A0HF | 0 | 727  | 77 | Positive | Positive | Negative  |
| TCGA-A7-A4SE | 0 | 644  | 54 | Negative | Negative | Negative  |
| TCGA-A0-A1KT | 0 | 541  | 78 | Positive | Positive | Equivocal |
| TCGA-LL-A73Y | 0 | 126  | 67 | Negative | Negative | Negative  |
| TCGA-D8-A27V | 0 | 381  | 62 | Positive | Positive | Negative  |
| TCGA-LQ-A4E4 | 0 | 849  | 73 | Positive | Positive | NA        |
| TCGA-A7-A26I | 0 | 661  | 65 | Negative | Negative | Equivocal |
| TCGA-D8-A1JS | 0 | 371  | 77 | Positive | Positive | Negative  |
| TCGA-BH-A0BW | 0 | 355  | 71 | Negative | Negative | NA        |
| TCGA-A0-A125 | 0 | 3019 | 72 | Positive | Positive | Negative  |
| TCGA-BH-A280 | 0 | 324  | 50 | Positive | Positive | Negative  |
| TCGA-BH-A201 | 0 | 210  | 64 | Positive | Positive | Negative  |
| TCGA-BH-A0HL | 0 | 72   | 56 | Positive | Positive | Equivocal |
| TCGA-A8-A09E | 0 | 1492 | 73 | Positive | Positive | Positive  |
| TCGA-BH-A1F2 | 1 | 959  | 53 | Positive | Positive | Positive  |
| TCGA-B6-A1KC | 0 | 1326 | 67 | Positive | Negative | Negative  |
| TCGA-A7-A0CJ | 0 | 931  | 57 | Positive | Positive | Negative  |
| TCGA-B6-A0RE | 0 | 6435 | 61 | Negative | Negative | NA        |
| TCGA-AR-A2LJ | 0 | 1912 | 40 | Positive | Positive | Positive  |
| TCGA-A8-A06R | 0 | 547  | 69 | Positive | Negative | Positive  |
| TCGA-BH-A0B3 | 0 | 1203 | 53 | Negative | Negative | Negative  |
| TCGA-Z7-A8R6 | 0 | 3256 | 46 | Positive | Positive | Negative  |
| TCGA-BH-A0DK | 0 | 423  | 49 | Positive | Positive | Negative  |
| TCGA-LD-A66U | 0 | 646  | 44 | Positive | Positive | Negative  |
| TCGA-A8-A09K | 0 | 912  | 68 | Positive | Positive | Negative  |
| TCGA-BH-A0BA | 0 | 1132 | 51 | Positive | Positive | Negative  |
| TCGA-A2-A3KC | 0 | 635  | 55 | Positive | Positive | Equivocal |
| TCGA-AN-A03Y | 0 | 10   | 66 | Positive | Positive | Negative  |
| TCGA-A8-A0A6 | 0 | 640  | 64 | Positive | Positive | Negative  |
| TCGA-AC-A3QP | 0 | 675  | 79 | Positive | Positive | Equivocal |
| TCGA-A2-A0YL | 0 | 1474 | 48 | Positive | Positive | Negative  |
| TCGA-B6-A0RG | 0 | 2082 | 26 | Negative | Negative | NA        |
| TCGA-AR-A5QN | 0 | 488  | 68 | Positive | Positive | Positive  |
| TCGA-BH-A204 | 1 | 2534 | 80 | NA       | NA       | NA        |
| TCGA-AQ-A1H2 | 0 | 475  | 84 | Positive | Positive | NA        |
| TCGA-C8-A12K | 0 | 0    | 80 | NA       | NA       | NA        |
| TCGA-E9-A249 | 0 | 29   | 45 | NA       | NA       | NA        |
| TCGA-BH-A208 | 1 | 1759 | 48 | NA       | NA       | NA        |
| TCGA-A2-A1FZ | 0 | 683  | 63 | Positive | Positive | Negative  |
| TCGA-D8-A1JI | 0 | 577  | 54 | Positive | Positive | Negative  |
| TCGA-GM-A2DA | 0 | 5909 | 46 | Positive | Positive | Equivocal |
| TCGA-A7-A0CD | 0 | 1165 | 66 | Positive | Positive | Equivocal |

|              |   |      |    |          |          |           |
|--------------|---|------|----|----------|----------|-----------|
| TCGA-BH-A0AZ | 0 | 867  | 47 | Positive | Positive | Negative  |
| TCGA-LD-A7W6 | 0 | 140  | 54 | Positive | Positive | Negative  |
| TCGA-PE-A5DE | 0 | 2645 | 41 | Positive | Positive | Negative  |
| TCGA-BH-A0W5 | 0 | 1288 | 77 | Positive | Positive | Equivocal |
| TCGA-B6-A0IK | 1 | 571  | 63 | Negative | Negative | NA        |
| TCGA-A0-A03V | 0 | 886  | 41 | Positive | Positive | Negative  |
| TCGA-A2-A0EU | 0 | 1043 | 79 | Positive | Positive | Negative  |
| TCGA-A8-A096 | 0 | 0    | 73 | Positive | Positive | Negative  |
| TCGA-A2-A04V | 1 | 1920 | 39 | Positive | Positive | Equivocal |
| TCGA-D8-A1J8 | 0 | 431  | 77 | Positive | Positive | Negative  |
| TCGA-A2-A04U | 0 | 671  | 47 | Negative | Negative | Negative  |
| TCGA-A8-A081 | 0 | 0    | 80 | Positive | Positive | Negative  |
| TCGA-D8-A3Z6 | 0 | 563  | 56 | Positive | Positive | Negative  |
| TCGA-AN-A0XT | 0 | 10   | 54 | Positive | Negative | Negative  |
| TCGA-D8-A27W | 0 | 373  | 55 | Positive | Positive | Equivocal |
| TCGA-EW-A1PE | 0 | 320  | 56 | Positive | Positive | Negative  |
| TCGA-AC-A80P | 0 | 614  | 72 | Positive | Positive | NA        |
| TCGA-AC-A80Q | 0 | 34   | 72 | Negative | Negative | NA        |
| TCGA-C8-A27B | 0 | 30   | 48 | Negative | Negative | Negative  |
| TCGA-A0-A0JL | 0 | 1683 | 59 | Negative | Negative | Negative  |
| TCGA-E2-A15F | 0 | 658  | 64 | Positive | Positive | Negative  |
| TCGA-BH-A6R9 | 0 | 160  | 61 | Negative | Positive | Negative  |
| TCGA-BH-A1FL | 1 | 1673 | 69 | Positive | Positive | NA        |
| TCGA-S3-A6ZH | 0 | 515  | 29 | Positive | Positive | Equivocal |
| TCGA-AR-A24R | 0 | 2653 | 45 | Positive | Positive | Negative  |
| TCGA-C8-A275 | 0 | 1    | 56 | NA       | NA       | NA        |
| TCGA-A0-A1KS | 0 | 16   | 69 | Positive | Positive | Equivocal |
| TCGA-BH-A18F | 0 | 268  | 50 | Positive | Positive | Negative  |
| TCGA-BH-A1EY | 1 | 538  | 79 | Positive | Positive | Negative  |
| TCGA-A8-A09Z | 0 | 0    | 83 | Positive | Negative | Negative  |
| TCGA-D8-A1XL | 0 | 606  | 34 | Positive | Positive | Equivocal |
| TCGA-A2-A04Q | 0 | 1276 | 48 | Negative | Negative | Equivocal |
| TCGA-A0-A12G | 0 | 1266 | 75 | Positive | Positive | Positive  |
| TCGA-AC-A3W6 | 0 | 602  | 90 | Positive | Positive | Negative  |
| TCGA-BH-A1EV | 1 | 365  | 45 | Positive | Positive | Positive  |
| TCGA-D8-A1Y3 | 0 | 430  | 61 | Positive | Positive | NA        |
| TCGA-E2-A1LB | 0 | 1231 | 41 | Negative | Negative | Positive  |
| TCGA-B6-A0WS | 1 | 2965 | 58 | Positive | Positive | NA        |
| TCGA-C8-A3M7 | 0 | 1    | 60 | Negative | Negative | Negative  |
| TCGA-AR-A0U4 | 0 | 2615 | 54 | Negative | Negative | Negative  |
| TCGA-E9-A1NG | 1 | 786  | 62 | Positive | Positive | Negative  |
| TCGA-BH-A203 | 1 | 1174 | 78 | NA       | NA       | NA        |
| TCGA-B6-A0WV | 1 | 2422 | 67 | Positive | Positive | NA        |
| TCGA-EW-A10W | 0 | 694  | 58 | Negative | Negative | Negative  |

|              |   |      |    |          |          |           |
|--------------|---|------|----|----------|----------|-----------|
| TCGA-AR-A2LK | 0 | 1304 | 62 | Positive | Positive | Equivocal |
| TCGA-BH-AOBT | 0 | 1386 | 56 | Positive | Positive | Negative  |
| TCGA-A8-A07U | 0 | 760  | 66 | Negative | Positive | Negative  |
| TCGA-A8-A090 | 0 | 0    | 74 | Positive | Positive | Positive  |
| TCGA-D8-A146 | 0 | 643  | 57 | Positive | Positive | Negative  |
| TCGA-E9-A248 | 0 | 59   | 51 | NA       | NA       | NA        |
| TCGA-D8-A1JL | 0 | 611  | 72 | Negative | Negative | Negative  |
| TCGA-A1-A0SG | 0 | 434  | 61 | Positive | Positive | Negative  |
| TCGA-A8-A0A9 | 0 | 396  | 80 | Positive | Positive | Negative  |
| TCGA-BH-A0E9 | 0 | 1405 | 53 | Positive | Positive | Negative  |
| TCGA-AR-A251 | 0 | 2387 | 51 | Positive | Negative | Equivocal |
| TCGA-A0-A0JG | 0 | 798  | 49 | Positive | Positive | Negative  |
| TCGA-AR-A2LL | 0 | 2012 | 70 | Positive | Positive | Equivocal |
| TCGA-GM-A2DL | 0 | 2763 | 50 | Positive | Positive | Negative  |
| TCGA-AR-A0TV | 0 | 905  | 66 | Positive | Positive | Equivocal |
| TCGA-A0-A1KR | 0 | 2141 | 51 | Negative | Negative | Negative  |
| TCGA-A2-A0SU | 0 | 1662 | 66 | Positive | Positive | Negative  |
| TCGA-A8-A07Z | 0 | 853  | 85 | Positive | Positive | Negative  |
| TCGA-D8-A3Z5 | 0 | 1015 | 54 | Positive | Positive | Negative  |
| TCGA-E2-A1LS | 0 | 470  | 46 | Negative | Negative | Negative  |
| TCGA-AR-A2L0 | 0 | 1198 | 46 | Positive | Positive | Equivocal |
| TCGA-OL-A5DA | 0 | 1783 | 61 | Positive | Positive | NA        |
| TCGA-A8-A09V | 0 | 457  | 51 | Positive | Positive | Negative  |
| TCGA-AN-A0XU | 0 | 10   | 54 | Negative | Negative | Negative  |
| TCGA-EW-A1P0 | 0 | 1251 | 55 | Positive | Negative | Negative  |
| TCGA-BH-A8FY | 1 | 295  | 87 | Positive | Positive | Negative  |
| TCGA-A0-A128 | 0 | 3248 | 61 | Negative | Negative | Negative  |
| TCGA-B6-A0I8 | 1 | 749  | 46 | NA       | NA       | NA        |
| TCGA-D8-A1XT | 0 | 193  | 61 | Negative | Negative | Positive  |

a. Overall Survival. b. the age at diagnosis

**Supplementary Table S2: Univariate Cox regression analysis reveal significant relation between lncRNA expression and survival time**

| <b>Gene symbol</b>      | <b>Chromosomal position</b> | <b>P-Value</b> |
|-------------------------|-----------------------------|----------------|
| <i>CAT304</i>           | chr2:122407202-122409328    | 2.10E-05       |
| <i>STXBP5-AS1</i>       | chr6:146841388-147204614    | 4.10E-05       |
| <i>C7orf29/113763</i>   | chr7:150004597-150035352    | 9.40E-05       |
| <i>FLJ90757/440465</i>  | chr17:78988880-79008646     | 1.60E-04       |
| <i>FLJ35776/649446</i>  | chr18:3495841-3874284       | 2.60E-04       |
| <i>CAT104</i>           | chr1:148879196-148879701    | 2.80E-04       |
| <i>LOC282997/282997</i> | chr10:112628646-112658585   | 3.60E-04       |
| <i>LINC01234</i>        | chr12:113744577-113773683   | 6.90E-04       |

|                     |                         |          |
|---------------------|-------------------------|----------|
| <i>LOC100188949</i> | chr13:30913240-30951282 | 9.00E-04 |
| <i>CAT1952</i>      | chr17:48633027-48639664 | 1.00E-03 |
| <i>CAT2247</i>      | chr22:39056343-39077882 | 1.00E-03 |

**Supplementary Table S3: Three lncRNAs significantly associated with overall survival of patients in the training-set ( $n = 532$ )**

| Gene name         | TCGA Gene_ID <sup>a</sup> | Genomic coordinates            | P-value | Hazard ratio | Coefficient <sup>b</sup> |
|-------------------|---------------------------|--------------------------------|---------|--------------|--------------------------|
| <i>CAT104</i>     | <i>uc001emi.3</i>         | chr1:14887919<br>6- 148879701  | 2.8E-04 | 0.771        | -0.26                    |
| <i>LINC01234</i>  | <i>uc001tvk.1</i>         | chr12:1137445<br>77- 113773683 | 6.9E-04 | 0.771        | 0.201                    |
| <i>STXBP5-AS1</i> | <i>uc003qlu.1</i>         | chr6:14684138<br>8..147204614  | 3.9E-05 | 1.673        | 0.514                    |

**Supplementary Table S4. Clinical characteristics of breast cancer patients belonging to low or high risk group in the training set, the Validation set and the total patient set**

| Characteristic | Training set |           | P Value               | Validation set |           | P Value               | Total set |           | P Value               |
|----------------|--------------|-----------|-----------------------|----------------|-----------|-----------------------|-----------|-----------|-----------------------|
|                | Low-risk     | High-risk |                       | Low-risk       | High-risk |                       | Low-risk  | High-risk |                       |
| Mean Age       | 58.85        | 58.16     | 0.53 <sup>a</sup>     | 57.41          | 59.45     | 0.48 <sup>a</sup>     | 58.20     | 58.76     | 0.09 <sup>a</sup>     |
| Mean OS_time   | 1113         | 982       | 1.37E-07 <sup>a</sup> | 1189           | 888       | 2.04E-06 <sup>a</sup> | 1145      | 942       | 7.18E-12 <sup>a</sup> |
| Vital Status   |              |           |                       |                |           |                       |           |           |                       |
| Living         | 251          | 218       | 9.51E-06 <sup>b</sup> | 245            | 225       | 6.80E-04 <sup>b</sup> | 496       | 443       | 4.51E-07 <sup>b</sup> |
| Dead           | 15           | 48        |                       | 21             | 41        |                       | 36        | 89        |                       |

a. Log-rank test, b. Chi-square test.

**Supplementary Table S5: Kaplan–Meier and ROC analyses of three-lncRNA signature and ten known biomarkers**

| Biomarker     | AUC   | P-value | 95% CI of AUC | P-value <sup>a</sup> |
|---------------|-------|---------|---------------|----------------------|
| Three_lncRNA  | 0.752 | <0.001  | 0.65–0.85     | <0.001               |
| <i>TP53</i>   | 0.582 | 0.159   | 0.47–0.69     | 0.329                |
| <i>ESR1</i>   | 0.501 | 0.991   | 0.39–0.61     | 0.251                |
| <i>PGR</i>    | 0.546 | 0.427   | 0.43–0.66     | 0.235                |
| <i>ERBB2</i>  | 0.599 | 0.088   | 0.48–0.71     | 0.245                |
| <i>HOTAIR</i> | 0.580 | 0.054   | 0.47–0.68     | 0.452                |
| <i>MKI67</i>  | 0.509 | 0.877   | 0.40–0.62     | 0.71                 |
| <i>MAPT</i>   | 0.645 | 0.012   | 0.54–0.75     | 0.011                |



|                                  |       |       |           |       |
|----------------------------------|-------|-------|-----------|-------|
| <i>SLC7A5</i>                    | 0.529 | 0.623 | 0.42–0.64 | 0.241 |
| <i>GNB2L1</i>                    | 0.606 | 0.068 | 0.50–0.72 | 0.164 |
| <i>RSF1</i>                      | 0.573 | 0.208 | 0.46–0.69 | 0.164 |
| Two-gene<br>( <i>MMP, LCN2</i> ) | 0.511 | 0.855 | 0.39–0.63 | 0.205 |

a. log-rand test

**Supplementary Table S6: Kaplan–Meier and ROC analyses of three-lncRNA signature together with different clinical characteristics**

| Biomarker                | AUC   | P-value  | 95% CI of AUC | P-value (log-rand) |
|--------------------------|-------|----------|---------------|--------------------|
| Three_lncRNA             | 0.752 | 1.43E-05 | 0.65-0.85     | 6.33E-08           |
| Age                      | 0.651 | 9.01E-03 | 0.54-0.76     | 1.10E-02           |
| Three_lncRNA and age     | 0.752 | 2.15E-04 | 0.65-0.85     | 2.10E-07           |
| Three_lncRNA and stage   | 0.750 | 2.36E-05 | 0.65-0.85     | 2.15E-04           |
| Three_lncRNA and subtype | 0.740 | 1.24E-05 | 0.62-0.85     | 5.20E-04           |

**Supplementary Table S7: KEGG-Pathway enrichment analysis of mRNA targets of miRNAs associated with three lncRNAs**

| KEGG_Pathway                                           | Count | P-Value  | Benjamini | Gene                                                                                                                                                    |
|--------------------------------------------------------|-------|----------|-----------|---------------------------------------------------------------------------------------------------------------------------------------------------------|
| Focal adhesion                                         | 20    | 7.90E-04 | 1.10E-01  | <i>COL4A4, COL4A2, PDGFB, DIAPH1, ITGB4, ACTN1, IGF1, COL2A1, PAK6, ACTG1, LAMA3, ITGA6, ITGB8, COL6A3, PDGFRB, RAP1B, THBS2, COL11A1, PIK3R1, MYLK</i> |
| Hypertrophic cardiomyopathy (HCM)                      | 12    | 8.40E-04 | 6.10E-02  | <i>TNNT2, ACTG1, ITGA6, ITGB8, LMNA, ITGB4, IGF1, CACNA2D3, CACNA1C, CACNA1D, EMD, TPM3</i>                                                             |
| Arrhythmogenic right ventricular cardiomyopathy (ARVC) | 11    | 1.30E-03 | 6.10E-02  | <i>ACTG1, ITGA6, ITGB8, LMNA, ITGB4, ACTN1, CACNA2D3, CACNA1C, CTNNA1, CACNA1D, EMD</i>                                                                 |
| Dilated cardiomyopathy                                 | 12    | 1.60E-03 | 5.90E-02  | <i>TNNT2, ACTG1, ITGA6, ITGB8, LMNA, ITGB4, IGF1, CACNA2D3, CACNA1C, CACNA1D, EMD, TPM3</i>                                                             |

|                                  |    |          |          |                                                                                                                                                                                   |
|----------------------------------|----|----------|----------|-----------------------------------------------------------------------------------------------------------------------------------------------------------------------------------|
| ECM-receptor interaction         | 11 | 2.70E-03 | 7.90E-02 | <i>COL4A4, CD47, COL4A2, LAMA3, ITGA6, ITGB8, COL6A3, ITGB4, COL2A1, THBS2, COL11A1</i>                                                                                           |
| Regulation of actin cytoskeleton | 19 | 4.20E-03 | 1.00E-01 | <i>FGFR2, FGF18, FGF7, PDGFB, DIAPH1, SSH2, ITGB4, ACTN1, PAK6, ACTG1, ITGA6, ITGB8, ARPC5L, PDGFRB, PIK3R1, MYLK, MYH10, SLC9A1, FGF4</i>                                        |
| Pathways in cancer               | 25 | 5.80E-03 | 1.20E-01 | <i>COL4A4, DVL2, FGFR2, FGF18, COL4A2, FGF7, PDGFB, NFKBIA, FASLG, IGF1, TFG, SMAD2, KIT, CTNNA1, RALGDS, CDK2, STAT3, TPM3, CCNE2, LAMA3, HIF1A, ITGA6, PDGFRB, PIK3R1, FGF4</i> |
| Notch signaling pathway          | 7  | 1.40E-02 | 2.30E-01 | <i>DVL2, NOTCH2, APH1A, DTX2, JAG2, RBPJ, NCOR2</i>                                                                                                                               |
| MAPK signaling pathway           | 20 | 1.80E-02 | 2.60E-01 | <i>FGFR2, FGF18, FGF7, TAOK2, PDGFB, NLK, TAOK3, FASLG, CACNA2D3, MAP4K3, RPS6KA3, RPS6KA4, MAP3K8, PLA2G2A, PDGFRB, RAP1B, CACNA1C, CACNA1D, MAP3K11, FGF4</i>                   |
| Ubiquitin mediated proteolysis   | 12 | 3.00E-02 | 3.70E-01 | <i>UBE2E3, UBE2O, UBE2Z, TRIM32, BIRC6, SIAH1, CDC34, UBE3C, UBE2NL, CUL4B, FBXW11, UBE2E1</i>                                                                                    |
| Tight junction                   | 11 | 5.80E-02 | 5.60E-01 | <i>ACTG1, MAGI3, TJP1, EPB41, ACTN1, CLDN11, CSDA, CTNNA1, CLDN14, MYH10, SPTAN1</i>                                                                                              |
| Small cell lung cancer           | 8  | 6.50E-02 | 5.70E-01 | <i>COL4A4, CCNE2, COL4A2, LAMA3, ITGA6, NFKBIA, CDK2, PIK3R1</i>                                                                                                                  |
| Calcium signaling pathway        | 13 | 7.00E-02 | 5.70E-01 | <i>PTGER3, ERBB3, P2RX4, GNAL, ADRB2, P2RX1, ADRA1B, PDGFRB, CACNA1C, PLCB1, CACNA1D, MYLK, HTR2A</i>                                                                             |
| Melanoma                         | 7  | 8.00E-02 | 5.90E-01 | <i>FGF18, FGF7, PDGFB, PDGFRB, IGF1, PIK3R1, FGF4</i>                                                                                                                             |
| Neurotrophin signaling pathway   | 10 | 8.00E-02 | 5.70E-01 | <i>MAGED1, NTRK3, RPS6KA3, RPS6KA4, GAB1, NFKBIA, FASLG, RAP1B, FRS2, PIK3R1</i>                                                                                                  |
| Prostate cancer                  | 8  | 8.30E-02 | 5.60E-01 | <i>CCNE2, FGFR2, PDGFB, NFKBIA, PDGFRB, IGF1, CDK2, PIK3R1</i>                                                                                                                    |

---

**Supplementary Table S8: The average expression levels and differences of genes in the interaction network and grouped based on lncRNA *CAT104***

| Gene                | Group with low expressed <i>CAT104</i> | Group with high expressed <i>CAT104</i> | <i>P</i> -Value |
|---------------------|----------------------------------------|-----------------------------------------|-----------------|
| <i>CAT104</i>       | 5.145                                  | 7.320                                   | 2.30E-235       |
| <i>hsa-mir-3200</i> | 2.363                                  | 1.723                                   | 4.47E-12        |
| <i>hsa-mir-18a</i>  | 3.311                                  | 2.978                                   | 5.54E-04        |
| <i>hsa-mir-17</i>   | 9.169                                  | 8.888                                   | 3.57E-04        |
| <i>GFRA1</i>        | 10.337                                 | 11.246                                  | 1.37E-05        |
| <i>ADRB2</i>        | 4.931                                  | 5.403                                   | 5.88E-09        |
| <i>LDB2</i>         | 7.562                                  | 7.919                                   | 2.52E-10        |
| <i>ID1</i>          | 7.376                                  | 7.859                                   | 5.65E-12        |
| <i>TENC1</i>        | 10.173                                 | 10.534                                  | 2.01E-12        |
| <i>COL6A3</i>       | 13.941                                 | 14.378                                  | 8.55E-08        |
| <i>CACNA1C</i>      | 7.441                                  | 7.924                                   | 1.81E-11        |
| <i>PDGFRB</i>       | 11.524                                 | 11.941                                  | 1.19E-11        |
| <i>ADAMTS6</i>      | 5.474                                  | 5.912                                   | 4.34E-10        |
| <i>COL7A1</i>       | 6.966                                  | 7.795                                   | 3.09E-13        |
| <i>DBNL</i>         | 10.862                                 | 11.034                                  | 1.84E-08        |
| <i>SMAD6</i>        | 6.082                                  | 6.346                                   | 1.67E-06        |
| <i>CLDN11</i>       | 6.232                                  | 6.758                                   | 2.07E-07        |
| <i>ERG</i>          | 7.852                                  | 8.138                                   | 8.35E-07        |
| <i>ZFPM2</i>        | 6.363                                  | 6.727                                   | 3.33E-06        |
| <i>FGF18</i>        | 3.263                                  | 3.810                                   | 6.89E-12        |
| <i>NPR1</i>         | 6.891                                  | 7.244                                   | 2.02E-06        |
| <i>NOX4</i>         | 7.037                                  | 7.438                                   | 8.41E-08        |
| <i>SLC31A2</i>      | 8.470                                  | 8.750                                   | 3.59E-07        |
| <i>TRIM8</i>        | 10.957                                 | 11.151                                  | 1.10E-08        |
| <i>ADAMTS7</i>      | 7.176                                  | 7.402                                   | 6.11E-04        |
| <i>CDK9</i>         | 10.007                                 | 10.193                                  | 9.03E-12        |
| <i>PRDM8</i>        | 4.120                                  | 4.553                                   | 2.43E-10        |

**Supplementary Table S9: The average expression levels and differences of genes in the interaction network and grouped based on lncRNA *LINC01234***

| Gene                | Group with low expressed <i>LINC01234</i> | Group with high expressed <i>LINC01234</i> | <i>P</i> -Value |
|---------------------|-------------------------------------------|--------------------------------------------|-----------------|
| <i>LINC01234</i>    | 0.021                                     | 1.715                                      | 2.20E-101       |
| <i>hsa-mir-190b</i> | 3.849                                     | 3.085                                      | 1.16E-09        |
| <i>IGF2BP2</i>      | 4.928                                     | 5.769                                      | 2.25E-12        |
| <i>ABTB2</i>        | 6.523                                     | 7.232                                      | 5.39E-16        |
| <i>TBPL1</i>        | 7.622                                     | 7.858                                      | 6.73E-11        |
| <i>KPNA2</i>        | 11.176                                    | 11.646                                     | 1.11E-15        |

|                |        |        |          |
|----------------|--------|--------|----------|
| <i>MTHFD1L</i> | 7.881  | 8.402  | 7.01E-14 |
| <i>BRD7</i>    | 10.009 | 10.206 | 5.41E-11 |
| <i>ATAD5</i>   | 6.503  | 6.98   | 3.37E-14 |
| <i>CIRH1A</i>  | 9.423  | 9.716  | 7.65E-16 |
| <i>OGDHL</i>   | 1.835  | 2.658  | 1.15E-10 |
| <i>UBE2O</i>   | 9.951  | 10.126 | 4.39E-08 |
| <i>WDR43</i>   | 9.82   | 10.071 | 2.05E-15 |
| <i>CCNB1</i>   | 9.614  | 9.99   | 6.39E-11 |
| <i>CDCA3</i>   | 7.362  | 7.837  | 4.67E-10 |
| <i>SENP5</i>   | 9.489  | 9.706  | 9.76E-15 |
| <i>POLR2D</i>  | 9.026  | 9.231  | 1.52E-13 |
| <i>CENPN</i>   | 7.923  | 8.453  | 4.28E-20 |
| <i>PSAT1</i>   | 5.762  | 7.085  | 8.02E-20 |
| <i>KIF11</i>   | 9.185  | 9.607  | 7.98E-12 |
| <i>SLC30A3</i> | 1.648  | 2.103  | 1.05E-08 |
| <i>SMAP1</i>   | 9.447  | 9.654  | 5.63E-11 |

**Supplementary Table S10: The average expression levels and differences of genes in the interaction network and grouped based on lncRNA *STXBP5-AS1***

| Gene               | Group with low<br>expressed<br><i>STXBP5-AS1</i> | Group with<br>high expressed<br><i>STXBP5-AS1</i> | <i>P</i> -Value |
|--------------------|--------------------------------------------------|---------------------------------------------------|-----------------|
| <i>STXBP5-AS1</i>  | 0.629                                            | 2.141                                             | 9.40E-250       |
| <i>hsa-mir-421</i> | 1.835                                            | 1.699                                             | 1.73E-02        |
| <i>hsa-mir-18a</i> | 3.253                                            | 3.036                                             | 2.49E-02        |
| <i>hsa-mir-17</i>  | 9.116                                            | 8.941                                             | 2.69E-02        |
| <i>GCNT4</i>       | 4.114                                            | 4.666                                             | 5.36E-09        |
| <i>IQSEC1</i>      | 10.518                                           | 10.713                                            | 7.79E-09        |
| <i>SYNJ1</i>       | 8.102                                            | 8.471                                             | 3.74E-20        |
| <i>ADAMTS6</i>     | 5.434                                            | 5.952                                             | 1.19E-13        |
| <i>HIF1A</i>       | 10.811                                           | 11.197                                            | 1.58E-09        |
| <i>CACNA1C</i>     | 7.442                                            | 7.923                                             | 2.13E-11        |
| <i>FNDC3A</i>      | 10.104                                           | 10.508                                            | 3.53E-21        |
| <i>FBXW11</i>      | 10.067                                           | 10.249                                            | 6.84E-09        |
| <i>AP3B1</i>       | 10.383                                           | 10.549                                            | 1.57E-09        |
| <i>TJP1</i>        | 10.58                                            | 10.914                                            | 3.26E-19        |
| <i>SAMD4A</i>      | 7.747                                            | 8.107                                             | 2.54E-09        |
| <i>BICC1</i>       | 5.878                                            | 6.955                                             | 4.02E-23        |
| <i>PTPRG</i>       | 8.437                                            | 9.18                                              | 9.12E-27        |
| <i>PDGFRB</i>      | 11.475                                           | 11.99                                             | 4.17E-17        |
| <i>LDB2</i>        | 7.526                                            | 7.956                                             | 1.95E-14        |
| <i>ARID4B</i>      | 10.449                                           | 10.695                                            | 3.18E-12        |
| <i>APOOL</i>       | 7.108                                            | 7.608                                             | 4.71E-16        |
| <i>GNAL</i>        | 4.892                                            | 5.47                                              | 3.29E-12        |
| <i>TP53BP1</i>     | 10.189                                           | 10.424                                            | 4.10E-10        |

|                |        |        |          |
|----------------|--------|--------|----------|
| <i>DOCK4</i>   | 8.142  | 8.649  | 8.02E-21 |
| <i>RANBP2</i>  | 11.468 | 11.71  | 7.71E-12 |
| <i>GJC1</i>    | 7.534  | 7.947  | 4.03E-13 |
| <i>MYLK</i>    | 10.456 | 11.041 | 2.96E-15 |
| <i>AFF1</i>    | 10.603 | 10.87  | 4.84E-09 |
| <i>FGF7</i>    | 6.826  | 7.36   | 1.40E-11 |
| <i>ZFR</i>     | 10.98  | 11.191 | 8.76E-13 |
| <i>ZBTB26</i>  | 6.29   | 6.645  | 1.14E-12 |
| <i>SP3</i>     | 10.991 | 11.17  | 1.33E-08 |
| <i>SENP6</i>   | 10.552 | 10.758 | 5.45E-12 |
| <i>PRTG</i>    | 5.226  | 5.79   | 7.49E-09 |
| <i>STK38L</i>  | 9.99   | 10.273 | 2.95E-08 |
| <i>ERG</i>     | 7.786  | 8.204  | 3.56E-13 |
| <i>MYO5A</i>   | 9.576  | 9.965  | 1.23E-17 |
| <i>ZFPM2</i>   | 6.267  | 6.823  | 8.73E-13 |
| <i>NDST2</i>   | 9.052  | 9.209  | 2.89E-09 |
| <i>PTPRB</i>   | 8.572  | 9.178  | 9.27E-20 |
| <i>TRIP11</i>  | 9.853  | 10.159 | 7.36E-13 |
| <i>ZNF704</i>  | 7.618  | 8.137  | 2.30E-10 |
| <i>STK17B</i>  | 9.476  | 9.812  | 3.23E-10 |
| <i>GAB1</i>    | 9.32   | 9.595  | 5.18E-09 |
| <i>MTM1</i>    | 8.281  | 8.546  | 1.19E-12 |
| <i>COL6A3</i>  | 13.871 | 14.448 | 1.20E-12 |
| <i>RNF111</i>  | 9.17   | 9.448  | 4.46E-15 |
| <i>CUL4B</i>   | 10.846 | 11.006 | 2.00E-09 |
| <i>RPS6KA3</i> | 9.152  | 9.613  | 4.76E-15 |

---
